1 Transcriptome of the parasitic flatworm *Schistosoma mansoni*  
2 during intra-mammalian development

3

4 Arporn Wangwiwatsin<sup>1,2</sup>, Anna V. Protasio<sup>1,3</sup>, Shona Wilson<sup>3</sup>, Christian Owusu<sup>1</sup>, Nancy E.  
5 Holroyd<sup>1</sup>, Mandy J. Sanders<sup>1</sup>, Jacqueline Keane<sup>1</sup>, Mike J. Doenhoff<sup>4</sup>, Gabriel Rinaldi<sup>1</sup>, Matthew  
6 Berriman<sup>1\*</sup>

7

8

9 <sup>1</sup> Wellcome Sanger Institute, Wellcome Genome Campus, Hinxton, UK

10 <sup>2</sup> Department of Biology, Faculty of Science, Khon Kaen University, Khon Kaen, Thailand

11 <sup>3</sup> Department of Pathology, Tennis Court Road, University of Cambridge, Cambridge, UK

12 <sup>4</sup> School of Life Sciences, University of Nottingham, University Park, Nottingham, UK

13

14

15 \* Corresponding author

16 Email: [mb4@sanger.ac.uk](mailto:mb4@sanger.ac.uk) (MB)

## 18 **Abstract**

19 Schistosomes are parasitic blood flukes that survive for many years within the  
20 mammalian host vasculature. How the parasites establish a chronic infection in the hostile  
21 bloodstream environment, whilst evading the host immune response is poorly understood. The  
22 parasite develops morphologically and grows as it migrates to its preferred vascular niche,  
23 avoiding or repairing damage from the host immune system. In this study, we investigated  
24 temporal changes in gene expression during the intra-mammalian development of *Schistosoma*  
25 *mansoni*. RNA-seq data were analysed from parasites developing in the lung through to egg-  
26 laying mature adult worms, providing a comprehensive picture of *in vivo* intra-mammalian  
27 development. Remarkably, genes involved in signalling pathways, developmental control, and  
28 adaptation to oxidative stress were up-regulated in the lung stage. The data also suggested a  
29 potential role in immune evasion for a previously uncharacterised gene. This study not only  
30 provides a large and comprehensive data resource for the research community, but also reveals  
31 new directions for further characterising host–parasite interactions that could ultimately lead  
32 to new control strategies for this neglected tropical disease pathogen.

## 33 **Author Summary**

34 The life cycle of the parasitic flatworm *Schistosoma mansoni* is split between snail and  
35 mammalian (often human) hosts. An infection can last for more than 10 years, during which  
36 time the parasite physically interacts with its mammalian host as it moves through the  
37 bloodstream, travelling through the lungs and liver, to eventually establish a chronic infection in  
38 the blood vessels around the host gut. Throughout this complex journey, the parasite develops  
39 from a relatively simple larval form into a more complex, sexually reproducing adult. To  
40 understand the molecular basis of parasite interactions with the host during this complex  
41 journey we have produced genome-wide expression data from developing parasites. The  
42 parasites were collected from experimentally-infected mice over its developmental time-course

43 from the poorly studied lung stage, to the fully mature egg-laying adult worm. The data  
44 highlight many genes involved in processes known to be associated with key stages of the  
45 infection. In addition, the gene expression data provide a unique view of interactions between  
46 the parasite and the immune system in the lung, including novel players in host-parasite  
47 interactions. A detailed understanding of these processes may provide new opportunities to  
48 design intervention strategies, particularly those focussed on the early stages of the infection  
49 that are not targeted by current chemotherapy.

50

## 51 **Introduction**

52 The blood fluke *Schistosoma mansoni* is a major aetiological agent of hepatic and  
53 intestinal schistosomiasis, a Neglected Tropical Disease that affects over 200 million people  
54 around the world, largely in developing regions (1). Standard treatment of schistosomiasis  
55 relies on a single drug, praziquantel, and drug resistance is an ever-present threat with  
56 emerging reports of reduced efficacy to praziquantel in the field (2). A better understanding is  
57 needed of molecular and cellular mechanisms underlying the establishment of infections, so  
58 that vulnerabilities will be revealed with potential for targeting by new control tools.

59 Schistosomes are transmitted between mammalian hosts by susceptible aquatic snails.  
60 Each snail releases thousands of motile cercariae that seek out a host, penetrate through its skin  
61 and transform into larvae known as schistosomula. The schistosomula enter the bloodstream  
62 *via* the capillary beds and by day 6 post-infection are mainly present in the lung capillaries (3,4).  
63 After leaving the lung, the parasites circulate within the blood vessels throughout the body  
64 while developing organs, growing in size and eventually reaching the liver. Approximately 21  
65 days post-infection, parasite accumulation in the liver peaks (3,5). In the case of *S. mansoni*,  
66 male and female parasites pair up over the following weeks, migrate from the liver to the  
67 mesenteric veins *via* the portal system and become sexually mature (3). By day-35 the parasites

68 reach full maturity in the mesenteric veins (3), where they release eggs that traverse the  
69 intestinal wall and reach the gut lumen. The eggs pass with faeces to the environment where  
70 they hatch free-living larvae that infect snails to continue the life cycle.

71           Comprehensive studies of intra-mammalian schistosomes have been compromised by  
72 difficulties in accessing all developmental stages of the parasite; consequently, studies have  
73 focused on juvenile forms just after skin penetration, or adult worms. Little is known about the  
74 intervening developmental stages; the lung stage, in particular, represents a key point of  
75 parasite attrition during primary and challenged infections of experimentally-infected animals  
76 (4,6,7).

77           Intra-mammalian development of *S. mansoni* has previously been investigated using  
78 transcriptomics (8–12) but an incomplete picture has been pieced together from material  
79 obtained *in vivo* and *in vitro*. Obtaining sufficient quantities of lung stage parasites in particular  
80 has been a major obstacle (8,10,11). Here, we describe the *S. mansoni* transcriptome during six  
81 stages of development within experimentally-infected mice, ranging from the early lung stage to  
82 sexually mature egg-laying worms. Gene expression changes correlated well with the known  
83 biology of egg production in the adult stages, and with growth and developmental control in the  
84 liver developmental stages of the parasite. Notably, the lung-stage transcriptome provided new  
85 insights into host immune-evasion by the parasite, oxidative stress regulation, as well as  
86 potential novel players in host-parasite interactions. This study not only provides novel  
87 resources for the community to understand schistosome biology, but also reveals molecular  
88 mediators at the host-parasite interface.

## 89 **Materials and methods**

### 90 **Ethical statement**

91 All procedures involving mice were performed by authorised personnel according to the  
92 UK Animals (Scientific Procedures) Act 1986 with project license held by MJD (number PPL  
93 40/3595). The work was approved by the Ethical Review Committee of the University of  
94 Nottingham and was carried out in strict accordance with UK Home Office regulations for  
95 animal welfare and amelioration of suffering.

### 96 **Mouse infection**

97 Mice were infected with cercariae shed from *Biomphalaria glabrata* snails as described  
98 (13). In brief, percutaneous infections were performed by applying suspensions of mixed-sex  
99 cercariae to the shaved abdomens of anaesthetised mice and leaving for 30 minutes. Mice were  
100 infected with the following numbers of cercariae: 2000 to provide day-6 and day-13 parasites,  
101 500 for days 17 and 21, 350 for day 28, and 300 for day 35 (Fig 1). Four mice were used for  
102 adult stage parasites and up to 8 mice were used for juvenile stages (Fig 1). More mice were  
103 used for early time points due to the greater uncertainty in acquiring the samples. All mice were  
104 females of CD-1 outbred strain (Charles River, Harlow, UK) aged between 8-12 weeks by the  
105 time of infection. A pool of mixed-sex parasites from each mouse was considered a biological  
106 replicate.

107 **Fig 1. The numbers of mice and cercariae used for infections.** Mice were infected with  
108 indicated numbers of cercariae for parasite collection at six time points post-infection. The  
109 number of mice used for each time point is shown on the left. The method for parasite collection  
110 at day 6 involves mincing and incubation of the lung. Collections at other time points were done  
111 by portal perfusion.

## 112 **Parasite material collection and imaging**

113           On the indicated day post-infection, mice were culled using an overdose of  
114 pentobarbitone containing 10 U/ml heparin. Day-6 lung-stage parasites were collected as  
115 described (13). Briefly, lungs collected from infected mice were minced using a sterile scalpel  
116 cut into approximately 1 mm<sup>3</sup> pieces and incubated in 50 ml heparinised modified Basch media  
117 (10 U/ml heparin) (see supplementary information) for approximately 1 hour at room  
118 temperature, followed by 3 hours at 37 °C, 5% CO<sub>2</sub> to allow the parasites to exit the tissue. The  
119 tube contents were mixed by turning the tube 2-3 times before being passed through a 600 µm  
120 mesh into new 50 ml tubes to separate large pieces of tissue from worms. The filtrate was  
121 centrifuged at 150 x g for 3 minutes at room temperature and approximately half of the  
122 supernatant was discarded by gently decanting. Lung-stage worms were recovered using a  
123 Pasteur pipette to collect approximately 1-1.5 ml from the bottom of the tube. Given that  
124 parasites from day-6 post-infection were collected only from the lung and not by perfusion,  
125 circulating parasites that had left the lung were therefore excluded. For this reason, day-6  
126 worms in the present study are hereafter referred to as 'lung stage'.

127           For all other time points, parasites were collected by portal perfusion with  
128 approximately 30 ml of perfusion media (Dulbecco's Modified Eagle's Medium (DMEM) high  
129 glucose, with 10 U/ml heparin). Parasites were left to settle for 30 minutes at room temperature  
130 and washed twice with DMEM before being recovered with a Pasteur pipette from the bottom of  
131 the tube.

132           Parasites were transferred to a Petri dish for imaging using an Olympus SZ61 dissecting  
133 microscope with a Euromex Cmex10 camera and Image Focus 4.0 software. A subset of the  
134 parasites from each mouse was imaged for morphology scoring. After imaging, parasites were  
135 transferred into a 2 ml Eppendorf tube and centrifuged at 150 x g for 3 minutes before replacing  
136 the supernatant with 1 ml TRIzol (Thermo Fisher), left at room temperature for up to 1 hour,  
137 transferred to dry ice for transport, and later stored at -80 °C until RNA extraction. An average

138 of 31 worms were imaged per mouse (range 18-75 worms); this did not represent a total  
139 number of parasites collected.

## 140 **Parasite morphology scoring**

141 Parasite morphology was classified using numerical scores based on published  
142 categories (14). Parasite features used for categorisation were the presence of a haemozoin-  
143 filled gut, the shape and length of the gut (fork end, closed end, proportion of the posterior end  
144 of the gut to the anterior section), and whether the worms were paired or unpaired. The scoring  
145 was performed blindly, i.e. all images were renamed to randomised numbers. Different numbers  
146 of worms ranging from 18-75 were morphologically scored among replicates; hence, the  
147 number of parasites that fell into each morphology category was shown as a percentage of the  
148 total worms morphologically scored in that replicate.

## 149 **RNA extraction**

150 RNA was extracted from parasite material using a modified phenol-chloroform method  
151 and column purification. Briefly, frozen samples in TRIzol reagent were thawed on ice,  
152 resuspended by gently pipetting and transferred to 2 ml tubes containing ceramic beads  
153 (MagNA Lyser Green Beads, Roche). The parasites were homogenised in a MagNA Lyser  
154 Instrument (FastPrep-24) at maximum speed twice for 20 seconds, with a 1-minute rest on ice  
155 in between. Next, 200 µl of chloroform-isoamyl alcohol 24:1 was added to each tube, followed  
156 by vigorous shaking for 5 seconds. The tubes were centrifuged at 13,000 x g for 15 minutes at  
157 4°C to separate the aqueous and organic solvent layers. The aqueous layer was transferred into  
158 a RNase-free 1.5 ml tube and one volume of 100% ethanol added and mixed by pipetting. The  
159 mixture was transferred to Zymo RNA Clean & Concentrator-5 column (Zymo Research) and  
160 processed according to the manufacturer's protocol. To elute the RNA, 15 µl of RNase-free water  
161 was added to the column and centrifuged for 30 seconds at 13,000 x g. The RNA concentration

162 and integrity were measured by Agilent RNA 6000 Nano kit (5067-1511, Agilent Technologies),  
163 and its purity assessed using a NanoDrop spectrophotometer.

## 164 **Library preparation and sequencing**

165 One to 2.8 µg of RNA was used to prepare each sequencing library. The libraries were  
166 produced using TruSeq Stranded RNA Sample Preparation v2 Kits (Illumina). Libraries were  
167 amplified using 10-14 cycles of PCR and cleaned using Agencourt AMPure XP Beads (Beckman  
168 Coulter). The libraries were quantified by qPCR before sequencing using the Illumina HiSeq  
169 2500 platform. All sequencing data was produced as 75 bp paired-end reads and is available  
170 through ENA study accession number ERP113121.

## 171 **Read mapping and quantifying read counts**

172 Sequencing reads were mapped to the *S. mansoni* reference genome v5 (15) from  
173 WormBase ParaSite (16) using TopHat version 2.0.8 (17) with default parameters except the  
174 following: -g 1 (only report 1 alignment for each read); --library-type fr-firststrand (for dUTP  
175 Illumina library); -a 6 (minimum anchor length); -i 10 and --min-segment-intron 10 (minimum  
176 intron length); -I 40000 and --max-segment-intron 40000 (maximum intron length); --  
177 microexon-search (find alignment to micro-exons). The resulting BAM files of accepted hits  
178 were sorted by read name (-n option) and indexed using SAMtools (18). A GFF file of gene  
179 annotations from GeneDB.org was filtered to keep only the longest transcript for each gene. The  
180 GFF file and sorted BAM files were used as inputs for HTSeq-count version 0.7.1 (19) to obtain  
181 read counts per transcript and used for read count analysis. HTSeq-count was run with default  
182 parameters except with strand option set to suit dUTP libraries (-s reverse), and alignment  
183 score cut-off increased (-a 30).



## 184 **Differential expression analysis**

185           Analyses were performed using RStudio version 0.99.489 (20), with R version 3.3.1  
186 (21). DESeq2 (version 1.12.3) (22) was used to import read counts, to investigate overall  
187 transcriptomic differences among samples using principal component analysis (PCA), to  
188 normalise read counts, and to identify genes differentially expressed in the time-course or in  
189 pairwise comparisons. PCA used regularized log-transformed (rlog-transformed) read count  
190 data as input. Differential expression analyses were performed with either likelihood-ratio tests  
191 (when the whole time-course was considered) or with the Wald test (when used with pairwise  
192 comparisons) and statistical significance was determined by adjusting p-values according to the  
193 Benjamini–Hochberg procedure to control false discovery rate (23). Differentially expressed  
194 genes were defined as those with adjusted p-value  $< 0.01$  and  $\log_2$  fold change in expression  $> 1$   
195 or  $< -1$ .

## 196 **Gene clustering**

197           Genes were clustered using self-organising maps constructed in the R package Kohonen  
198 (version 2.0.19) (24) based on their mean-normalised, rlog-transformed counts over the time-  
199 course. The mean-normalised counts were used to calculate means of replicates at each time  
200 point for each gene and used as input for clustering. Genes were grouped based on their  
201 expression pattern into 96 clusters. To reduce background signal, only genes that were  
202 differentially expressed in at least one time point (likelihood ratio test, adjusted p-value  $< 0.01$ ,  
203 7987 genes, S1 Table) were used as inputs for clustering.

## 204 **Gene Ontology enrichment**

205           Gene Ontology (GO) annotations for the *S. mansoni* genes were downloaded from  
206 GeneDB.org. Identification of enriched GO terms (biological process terms) was performed  
207 using topGO (version 2.24.0) (25) with a *weight* algorithm and Fisher's exact test. All *S. mansoni*  
208 genes were used as a reference background for the enrichment analysis.

## 209 **Protein structure prediction**

210 Amino acid sequences for proteins of interest were obtained from GeneDB.org. Protein  
211 3D structures were predicted from amino acid sequences using I-TASSER online server (v5.0)  
212 (26–28) with default parameters. TM-scores indicate similarity between two structures. The  
213 value ranges between 0-1 with a higher value inferring better match. Images of the predicted  
214 structures and their alignment were from .pdb files obtained from I-TASSER predictions or from  
215 Protein Data Bank (PDB) (29) and reproduced using Chimera software (30).

## 216 **Protein domain searching**

217 Protein domains were identified from amino acid sequences using InterProScan online  
218 server (v60 and v61) (31). CathDB (32) was used to explore protein structural domains and to  
219 search by structural match.

## 220 **Results**

### 221 **Parasite morphologies correlate with marked transcriptional** 222 **signatures in developing parasites**

223 Changes in the morphology and transcriptome during intra-mammalian development of  
224 *S. mansoni* were investigated in parasites collected from experimentally-infected mice at time  
225 points between 6-35 days post-infection (Fig 1).

226 Lung schistosomula were morphologically homogeneous, whereas circulating larvae  
227 that had left the lungs (days 13 to 28) were heterogeneous in size and developmental  
228 progression (Fig 2), consistent with previous reports (3,14). At 28 days post infection, most of  
229 the parasites had developed into adults and worm pairs started to become evident. All day-35  
230 parasites were fully mature paired male and female adults (Fig 2).

231 **Fig 2. Morphology of *in vivo* *S. mansoni*.** A) Morphological scoring of *S. mansoni* parasites  
232 collected at the indicated time points post-infection (D06 to D35). Heatmap columns represent  
233 the twenty-one distinct morphological groups following published scores (14), and heatmap  
234 rows indicate biological replicates of the infections, i.e. parasites collected from individual mice.  
235 Colours on the heatmap show the number of worms that fell into each morphological group,  
236 normalised as a percentage of the total number of worms that were scored within the replicate.  
237 B) Representative images of worms from each time point. Scale bars: 1 mm.

238 Parasites from individual mice were pooled and each of these pools was considered a  
239 biological replicate. At least 3 biological replicates were obtained for each time point and  
240 changes in their transcriptomes were measured using RNA-seq. A principle components  
241 analysis showed tight clustering of biological replicates and a large variation among the time  
242 points (Fig 3). All replicates from lung schistosomula clustered separately from day-13 to day-  
243 21 groups, and the adult stages (days 28 and 35) clustered away from the other time points,  
244 indicating a good correlation between the morphological progress and marked transcriptional  
245 signatures of the developing parasite. The transcriptional differences observed between day-28  
246 and day-35 parasites may be related to sexual maturation and egg laying, which is onset at day  
247 35 (14). In contrast, the transcriptional similarity of parasites at days 13, 17, and 21 may reflect  
248 genuinely similar gene expression profiles or the heterogeneity in the overlapping  
249 morphologies of parasites at those three time points.

250 **Fig 3. Principal component analysis of the transcriptomic data from all time points.** PCA  
251 plot of all transcriptomic data based on rlog-transformed normalised read counts. Each dot  
252 represents the transcriptome from a pool of parasites collected from individual mice, i.e. one  
253 biological replicate.

## 254 **Gene expression changes associated to developmental milestones**

### 255 **of *S. mansoni***

256 Comparing the transcriptomes of parasites collected 6 and 13 days post-infection  
257 provided information on the transition between lung schistosomula and circulating juveniles,  
258 i.e. parasites that have already left the lungs and have entered the systemic circulation *via* the  
259 pulmonary veins. In the lung schistosomula, 864 genes were up-regulated compared with day  
260 13 juveniles (S2 Table). The up-regulated genes related to multiple signalling processes  
261 including signal transduction and neuronal signalling pathways (S3 Table). This suggests that  
262 neuronal activities were increased in the lung stage, compared with day-13 stage, perhaps for  
263 sensing and locomotion to allow parasite migration through the lung capillary bed, to reach the  
264 pulmonary veins and continue through the rest of bloodstream circulation (33). In contrast, 686  
265 genes were up-regulated in the day-13 schistosomula (S2 Table), including genes involved in  
266 mitosis and its associated processes, such as translation, post-translational modification, and  
267 transcriptional regulation (S3 Table). This is consistent with the growth phase described in day-  
268 13 worms and corroborates reports that mitosis was not detected in the lung stage (3,34).

269 As the parasites develop from circulating juveniles to adult forms, up-regulated genes  
270 identified in the liver stage (day 21) compared to pre-egg-laying adult stage (day 28) were  
271 involved in cell division, differentiation, and developmental regulation (S4 and S5 Tables). In  
272 contrast, gene expression in the day-28 worms showed a massive up-regulation of genes  
273 involved in egg production such as *tyrosinase* (Smp\_050270, Smp\_013540), *eggshell protein*  
274 (Smp\_000430), and *Trematode Eggshell Synthesis domain containing protein* (Smp\_077890) (S4  
275 Table). The Gene Ontology (GO) terms *metabolic processes* and *biosynthesis processes* were  
276 enriched in up-regulated genes at day 28 (S5 Table), possibly also reflecting synthesis of  
277 compounds necessary for egg production (*tyrosinase* genes are annotated with the terms  
278 *organic hydroxy compound biosynthetic process*). However, the increased biosynthesis also likely  
279 reflected increased nutrient and energy requirements, and scavenging of host-derived

280 substrates by the parasites because GO terms for lipid metabolic process, glycerol metabolic  
281 process, purine ribonucleoside salvage, and carbohydrate transport were also enriched (S5  
282 Table). The genes contributing to the enriched GO term carbohydrate transport encode two  
283 confirmed glucose transporters (Smp\_012440, Smp\_105410) (35) and a third, non-confirmed,  
284 putative glucose transporter (Smp\_139150).

285         Between days 28 and 35, the parasites become fully established in the portal system  
286 within the mesentery veins and lay large numbers of eggs. Expectedly, amongst the 72 genes  
287 that were up-regulated during the progression from day 28 to day 35, many were related to egg  
288 production (S6 Table). Proteases involved in blood feeding (36), *cathepsin B, D*, and *L* were also  
289 up-regulated (approximately 2.5-fold; S6 Table), consistent with the high nutrient requirement  
290 of egg-producing females. In addition, down regulation of genes involved in signalling and  
291 developmental control was evident (S6 and S7 Tables).

292         To further explore transcriptomic changes across all developmental stages analysed,  
293 genes were clustered into 96 groups based on their expression profile over the whole time-  
294 course (Fig 4 and S1 Fig). Specific expression patterns became evident for multiple clusters; for  
295 instance, clusters 1, 2, 9, 10, 17, 25, 26, 27, 33, and 34 showed increased expression in the  
296 developing parasites, from day 13 to day 28 post-infection (Fig 4 orange boxes and S1 Fig).  
297 These clusters comprised a total of 737 genes with the top five enriched GO terms related to cell  
298 replication and regulation (S8 and S9 Tables). Striking up-regulation in adult stages (day 28 and  
299 day 35) was seen in six clusters, particularly cluster 96 and to a lesser extent, clusters 79, 80, 87,  
300 88 and 95 (Fig 4 pink boxes, S1 Fig and S8 Table). These clusters comprised genes involved in  
301 egg production, such as two tyrosinase genes (Smp\_013540 and Smp\_050270) involved in  
302 protein cross-linking during egg-shell synthesis (37). Two of the egg-shell precursors  
303 (Smp\_131110 and Smp\_014610) (38) were also present in cluster 96 (S8 Table). In addition,  
304 multiple genes of unknown function shared expression patterns with these genes related to egg-

305 production, suggesting that they may have a related function or share the same pathway(s) (S8  
306 Table).

307 **Fig 4. Clusters of genes based on time-course expression pattern.** Expression profiles of  
308 genes showing differential expression in at least one time point, clustered into 96 groups. The  
309 clustering was based on mean-normalised regularized log (rlog-transformed) of raw read  
310 counts over six time points. The y-axes are scaled independently to emphasise the differences  
311 between clusters. Plots with a single y-axis scale are shown in S1 Fig. The coloured boxes mark  
312 clusters that were part of the GO term enrichment analyses or were discussed in detail; orange,  
313 clusters of genes with increased expression during the liver stage; blue, high expression in the  
314 lung stage and steadily declined toward adult stages; yellow, high expression in the lung stage;  
315 green, high expression in the lung and adult stages with low expression during liver stages;  
316 pink, high expression in adult stages.

### 317 **Genes involved in signalling pathways, iron homeostasis and micro-** 318 **exon genes (MEGs) up-regulated in lung schistosomula**

319 Given the scarcity of information about lung schistosomula, we further investigated the  
320 expression data using pairwise comparisons between the lung stage and day-13 parasites, and  
321 clustering across multiple time points. Lung stage-specific expression was seen mainly in three  
322 clusters (8, 24 and 32), where high expression on day 6 precipitously dropped to a low baseline  
323 for the rest of the time-course (Fig 4 yellow boxes, S1 Fig and S8 Table). The three clusters  
324 contained a total of 72 genes, and a GO term enrichment analysis suggested that many of these  
325 were involved in signalling, metabolism, transport and iron homeostasis (S10 Table).

326 Genes related to developmental control were also over-represented in 11 clusters that  
327 showed high expression in lung stage followed by a steady decline towards adult (cluster 5, 6, 7,  
328 13, 14, 15, 16, 21, 22, 23, 31; Fig 4 blue boxes, S1 Fig and S11 Table), including several  
329 transcription factors and cell adhesion proteins involved in embryogenesis and neuronal

330 development, such as *SOX* (Smp\_148110, Smp\_161600) and *procadherin family* (such as  
 331 Smp\_011430, Smp\_141740, and Smp\_155600) (39,40). In addition, *Wnt*, *nanos*, and *frizzled*  
 332 *receptors*, important for cell-fate determination and control of development (41–43), showed a  
 333 similar expression pattern.

334 Compared to day-13 stage, multiple signalling processes appeared to be up-regulated in  
 335 the lung stage; amongst the 864 genes up-regulated genes, the top-four enriched GO terms were  
 336 *signal transduction*, *male sex determination*, *potassium ion transport*, and *neurotransmitter*  
 337 *transport* (S2 and S3 Tables). The enrichment of several other GO terms, albeit with weaker  
 338 statistical support (p-values between 0.036-0.045), provided further evidence for the  
 339 prominent role of signalling processes in the lung stage (S2 and S3 Tables). Several  
 340 developmental terms were also enriched (e.g. *cell differentiation*, *homophilic cell adhesion*, *brain*  
 341 *development*, *male sex determination*). The pronounced expression of genes involved in  
 342 neuronal signalling – inferred from the GO terms *neuropeptide signalling pathway*, *sodium ion*  
 343 *transport*, *chloride transport* and *neurotransmitter transport* (S2 and S3 Tables) – may reflect the  
 344 parasite’s responsiveness to environmental cues. Consistent with the broad picture provided by  
 345 GO term enrichment, the top up-regulated genes in the lung stage compared to the day-13 stage  
 346 included a *rhodopsin orphan GPCR* (Smp\_203400), and two Ras related proteins (Smp\_132500,  
 347 Smp\_125060), all of which were up-regulated more than 32-fold (Table 1).

348 **Table 1. Top 20 genes up-regulated in day-6 compared to day-13 schistosomula**

| Gene identifier | Log <sub>2</sub> FC (D6/D13) | Adjusted p-value | Product name                                 |
|-----------------|------------------------------|------------------|----------------------------------------------|
| Smp_138080      | 12.62                        | 1.48E-19         | MEG-3 (Grail) family                         |
| Smp_138070      | 11.99                        | 3.58E-30         | MEG-3 (Grail) family                         |
| Smp_159810      | 11.22                        | 1.02E-48         | MEG-2 (ESP15) family                         |
| Smp_159800      | 9.66                         | 5.10E-28         | MEG-2 (ESP15) family                         |
| Smp_181510      | 9.58                         | 1.15E-13         | hypothetical protein                         |
| Smp_032990      | 8.98                         | 7.14E-13         | Calmodulin 4 (Calcium binding protein Dd112) |

|            |      |          |                                           |
|------------|------|----------|-------------------------------------------|
| Smp_159830 | 8.69 | 1.00E-05 | MEG-2 (ESP15) family                      |
| Smp_138060 | 8.06 | 3.76E-09 | MEG-3 (Grail) family                      |
| Smp_203400 | 7.34 | 1.88E-07 | rhodopsin orphan GPCR                     |
| Smp_005470 | 7.31 | 3.34E-08 | dynein light chain                        |
| Smp_077610 | 6.61 | 6.19E-07 | hypothetical protein                      |
| Smp_166350 | 6.59 | 1.31E-06 | hypothetical protein                      |
| Smp_180330 | 5.97 | 2.91E-32 | MEG 2 (ESP15) family                      |
| Smp_205660 | 5.84 | 4.52E-15 | hypothetical protein                      |
| Smp_033250 | 5.80 | 4.43E-05 | hypothetical protein                      |
| Smp_132500 | 5.73 | 4.50E-04 | ras and EF hand domain containing protein |
| Smp_152730 | 5.68 | 3.41E-11 | histone lysine N methyltransferase MLL3   |
| Smp_241430 | 5.61 | 3.89E-23 | Aquaporin 12A                             |
| Smp_125060 | 5.55 | 6.70E-04 | kinase suppressor of Ras (KSR)            |
| Smp_198060 | 5.51 | 4.73E-13 | hypothetical protein                      |

349 Log<sub>2</sub>FC (D6/D13), log<sub>2</sub> fold change of expression level between day-6 and day-13 schistosomula

350

351 The GO term *cellular iron ion homeostasis* was enriched amongst genes up-regulated in  
352 lung stage compared to day-13 schistosomula (S3 Table). For example, the *ferritin*-related genes  
353 (Smp\_047650, Smp\_047660, Smp\_047680) displayed fold changes in the range 2.1–7.2 (S2 and  
354 S3 Tables). These three *ferritin* genes, although down-regulated in day-13 compared to lung  
355 stage schistosomula, were still expressed at a low level during day 13 when iron is required for  
356 growth and development (S2 Fig). In contrast, other genes related to iron-sequestration were  
357 expressed at a similar level in the lung stage and day-13 stage, such as *putative ferric reductase*  
358 (Smp\_136400) and *Divalent Metal Transporter (DMT 1)* (Smp\_099850) (S3 Fig). Both genes are  
359 hypothesised to be involved in the same pathway, with the *putative ferric reductase* cleaving  
360 iron from host transferrin (glycoprotein iron carrier) before transporting into the parasite *via* a  
361 *DMT* (44,45).



362           Micro-exon genes (MEGs), whose structures mainly comprise short exons with lengths  
363 being multiples of three bases, are an abundant feature in parasitic helminths (46,47). Despite  
364 expression across all developmental stages, and at least 41 MEGs being annotated and assigned  
365 into sequence-similarity families (46,48), little is known about their function. *MEG-14* has been  
366 shown to interact with an inflammatory-related human protein (49), and *MEG-3*, *MEG-14*, *MEG-*  
367 *15*, *MEG-17* and *MEG-32*, were previously identified in the oesophagus of schistosomula or  
368 adults (50). Multiple MEGs were up-regulated in the lung stage, e.g. 6 of the 72 genes in the  
369 major lung stage expression clusters (cluster 8, 24 and 32) were MEGs (S8 Table). Most  
370 strikingly, cluster 8 contains eight genes, of which four are micro-exon genes (MEGs); two from  
371 the *MEG-2* family and two from *MEG-3* family (S8 Table). Three of these MEGs were previously  
372 shown to be up-regulated in schistosomula 3 days after *in vitro* transformation (Smp\_159810,  
373 Smp\_138070, Smp\_138080) and detected in schistosomula or egg secretions (48). Furthermore,  
374 a pairwise comparison revealed a total of 17 MEGs, from seven families, that were up-regulated  
375 in lung stage compared to day-13 schistosomula (S2 Table), with seven MEGs amongst the top  
376 20 lung-stage up-regulated genes (Table 1). In contrast, only one MEG, a member of *MEG-32*,  
377 was up-regulated in day-13 schistosomula compared to the lung stage (S2 Table).

## 378 **Lung stage expressed genes with anti-inflammatory roles**

379           Genes involved in defence against oxidative stress appeared to be up-regulated in lung  
380 schistosomula, presumably neutralising reactive oxygen species (ROS) produced during  
381 inflammation. For instance, *extracellular superoxide dismutase* was up-regulated by 17-fold  
382 compared to day-13 parasites (Smp\_174810) (S2 Table and S4 Fig). Superoxide dismutase  
383 catalyses the detoxification of superoxide by converting it into hydrogen peroxide and  
384 molecular oxygen (45,51). The antioxidant *thioredoxin peroxidase* (Smp\_059480) that  
385 neutralises peroxide (52) was similarly up-regulated (more than 16-fold) in the lung stage (S2  
386 Table) and thioredoxin glutathione reductase (TGR; Smp\_048430), another important enzyme  
387 in the redox pathway (53), showed marginally higher expression in the lung stage (S5 Fig). The

388 gene encoding *single Kunitz protease inhibitor* (Smp\_147730, S6 Fig), putatively involved in host  
389 immune defence (54), was also highly up-regulated in the lung stage (16-fold , adjusted p-value  
390 < 1E-100) (S2 Table).

391 These three genes with particularly striking up-regulation in the lung stage belong to  
392 the same cluster (cluster 72). Given the possible roles of cluster 72 genes in counteracting  
393 oxidative stress and in host immune system evasion, other genes from this cluster were  
394 explored in more detail. Cluster 72 contained seven additional genes (Table 2). Three encoded  
395 hypothetical proteins of unknown function, while the other four were predicted, based on  
396 sequence similarity, to encode proteins with recognisable products. The first, *arginase*  
397 (Smp\_059980), is hypothesised to counteract the host immune response by depleting l-arginine  
398 from blood, thereby preventing it from being used by macrophage in the production of nitric  
399 oxide (55,56). The second, a schistosome homologue of *early growth response protein* (EGR,  
400 Smp\_134870) displayed zinc finger and DNA-binding domains suggesting a role as transcription  
401 factor although its target(s), to our knowledge, remain(s) unidentified. The third and fourth  
402 proteins contained *PDZ* and *LIM* domains (Smp\_156510, Smp\_166920) but these also have no  
403 obvious link with host immune evasion.

404 **Table 2. Genes in cluster 72.**

| Gene identifier | Product name                                                     |
|-----------------|------------------------------------------------------------------|
| Smp_059480      | thioredoxin peroxidase                                           |
| Smp_059980      | arginase                                                         |
| Smp_074570      | hypothetical protein                                             |
| Smp_114660      | hypothetical protein                                             |
| Smp_134870      | early growth response protein                                    |
| Smp_147730      | single Kunitz protease inhibitor; serine type protease inhibitor |
| Smp_156510      | PDZ and LIM domain protein 7                                     |
| Smp_166920      | PDZ and LIM domain protein Zasp                                  |

|            |                                            |
|------------|--------------------------------------------|
| Smp_174810 | Extracellular superoxide dismutase (Cu Zn) |
| Smp_182770 | hypothetical protein                       |

405

406 Cluster 64 contained genes with similar expression profiles and, together with cluster  
407 72, was annotated with GO terms enriched for redox processes (S12 Table). Clusters 64 and 72  
408 also contained genes involved in cellular metabolism and transport. However, enrichment for  
409 these specific GO terms became more pronounced when two additional clusters (71 and 80),  
410 with reduced lung stage expression (Fig 4 green boxes), were included in the analysis (S13 and  
411 S14 Tables). Amongst the top enriched GO terms for all four clusters was *carbohydrate transport*  
412 with two glucose transporters (Smp\_012440 and Smp\_105410) that have been previously  
413 characterised in *S. mansoni* (35).

## 414 **Hypothetical protein with predicted structure matching a** 415 **complement cascade regulator**

416 With four genes out of ten in the cluster 72 potentially involved host immune  
417 interactions, the three that encoded hypothetical proteins (Smp\_074570, Smp\_114660,  
418 Smp\_182770) were investigated further. Peptides encoded by Smp\_074570 are abundant (top  
419 10) in secreted extracellular vesicles produced by *S. mansoni* schistosomula (57), suggesting a  
420 role in host-parasite interactions. No further published information was found for products of  
421 the other two genes, and both contained no known signature domains. I-TASSER protein-  
422 structure prediction software (26) was therefore used to align predicted structures against  
423 known structures in the Protein Data Bank (29). No match was found for Smp\_074570 and  
424 Smp\_114660, but remarkably, Smp\_182770 produced a single high confidence match (TM-score  
425 > 0.9) to human complement factor H (CFH; Protein Data Bank ID: 3GAW) (58) (Fig 5).

### 426 **Fig 5. Predicted structure of Smp\_182770 aligned with structure of human CFH. A)**

427 Predicted 3D structure of Smp\_182770 by I-TASSER server from the input amino acid sequence.

428 B) Alignment between the predicted structure (blue) and 3D structure of human CFH, in 250  
429 mM NaCl buffer, obtained from PDB (PDB identifier: 3GAW) (red). C) Domain components of  
430 human CHF identified by multiple databases through InterProScan web server (31). SCR, short  
431 consensus repeat; CCP, complement control protein. Both SCR and CCP are alternative names of  
432 the sushi domain.

433 CFH is a well-characterised regulator of the complement cascade that is normally found  
434 on the surface of human cells and prevents complement attack on self (59,60). The human CFH  
435 (amino acid sequence from 3GAW entry, PDB) contains *sushi/ccp* domain repeats (Fig 5C)  
436 involved in regulating complement cascade (ccp = component control protein). Smp\_182770  
437 does not contain the *sushi/ccp* domain repeats but it does encode tandem repeats similar to  
438 those expected from mammalian CFH genes (61).

439 Homologues of the Smp\_182770 are present in other *Schistosoma* species as well as  
440 other helminths, such as the liver flukes *Fasciola*, *Opisthorchis*, and *Clonorchis*, and the intestinal  
441 fluke *Echinostoma* (Fig 6A), suggesting an evolutionarily-conserved role (62,63). The  
442 Smp\_182770 locus on *S. mansoni* genome is immediately adjacent to Smp\_038730, another  
443 hypothetical protein. RNA-seq mapping suggested that the two were parts of the same gene (Fig  
444 6B). From gene clustering, Smp\_038730 is in cluster 24 which has similar expression pattern to  
445 cluster 72, but with noticeably lower expression in the adult stage (Fig 4 yellow box and S1 Fig).  
446 In a subsequent version of the *S. mansoni* genome (unpublished), the two genes have been  
447 merged to become Smp\_334090 (data available on WormbaseParasite.org). The predicted  
448 structure of Smp\_334090 also resembles that of human CFH (TM-score = 0.830) (S7 Fig).

449 **Fig 6. Homologous relationship of Smp\_182770 and alignment of RNA-seq reads to**  
450 **genomic locations.** A) Homologues of Smp\_182770. The information was obtained from  
451 WormBase ParaSite release 8 (16). Gene identifiers from the WormBase ParaSite are shown in  
452 the parentheses after the species names. B) Artemis screenshot showing the genomic region  
453 that contains Smp\_182770 and RNA-seq reads mapped from multiple RNA-seq libraries (two

454 top rows). Information on homologues of genes was obtained from WormBase ParaSite release  
455 8 and 9 (16) based on genetree generated by Compara pipeline (64).

## 456 Discussion

457 We have described a complete transcriptome time-course of *S. mansoni* covering key  
458 developmental stages during the intra-mammalian infection, including the first RNA-seq  
459 transcriptome of *in vivo* lung schistosomula. The data recapitulated known major biological  
460 changes for well-characterised parts of the life cycle in the mammalian host, as well as provided  
461 novel insights on molecular processes underlying parasite development and interaction with  
462 the host. In particular, analysis of the lung developmental stage highlighted striking signalling  
463 pathways, including those related to developmental control, cell differentiation and  
464 neuropeptide signalling. In addition, tentative strategies for immune evasion such as up-  
465 regulation of iron homeostasis, oxidative stress-related genes, and anti-inflammatory genes  
466 were revealed.

467 In early stages of *S. mansoni* infection, schistosomula elongate and migrate within lung  
468 capillaries (65). Although the cues involved in these changes are unknown (66), it is believed  
469 that schistosomula differentiate or remodel their existing cells, rather than trigger cell division  
470 (3,34). The up-regulation of signalling-related genes in this developmental stage emphasises  
471 processes required for a successful migration through lung capillaries. Furthermore, changes in  
472 development-related genes may play roles in the remodelling or trigger developmental onset  
473 observed in later stages. Neuronal signalling could involve both the sensing of stimuli and motor  
474 responses, and it is one of the biological processes disturbed in irradiated schistosomes (67)  
475 that exit lung capillaries into the alveoli and eventually die during the lung migration (7,65,68).  
476 The migration through the lung capillaries represents another challenge for the schistosomula.  
477 Moving within narrow lung capillaries, the schistosomula are in direct contact with the capillary  
478 endothelium (65) and they may interrupt blood flow, increasing the risk of microthrombosis or

479 leading to an accumulation of circulating immune cells (69). However, it has been shown that  
480 lung schistosomula can resist direct cytotoxic immune killing (6,68,70,71). Inflammation can be  
481 observed in the lung during the infection, but it appears not to be associated with the location of  
482 migrating parasites, but instead triggered by damaged host tissue (72). The accumulation of  
483 immune cells, instead of killing the parasites, is thought to either disrupt blood vessels, inducing  
484 microhemorrhage and causing the parasites to migrate into alveoli, or it may act as a plug that  
485 blocks migration (5,7).

486 Our data revealed that multiple genes with potential immune evasion or protective roles  
487 are up-regulated. One example was the Kunitz protease inhibitor that has an anti-coagulation  
488 and anti-inflammation role (54) and has been proposed as a vaccine candidate against *S.*  
489 *mansoni* (73). Neutralisation of oxidative stress by up-regulating dismutase and peroxidase  
490 systems may mitigate the effects of inflammation caused by migrating schistosomula. Both ROS  
491 and iron metabolism are involved in the host immune response; therefore, iron homeostasis  
492 and ROS neutralisation have likely evolved as an immune evasion strategy in these parasites  
493 (45). Schistosomula also clearly face the risk of oxidative damage from the uniquely high oxygen  
494 tension in the lung (74,75) and therefore have a further requirement for maintaining redox  
495 balance. In rodents, expression of thioredoxin is induced by oxidative stress (75). The up-  
496 regulation of schistosome ROS metabolism likely also depends on changes in the environment  
497 rather than a hard-wired gene expression programme. In contrast to our *in vivo* results from  
498 lung schistosomula, genes related to stress and immune evasion are expressed at a lower level  
499 when the parasites are cultivated *in vitro* (8), highlighting the need to study parasites obtained  
500 from their most natural environment to understand relevant biological processes.

501 Multiple genes with tentative roles in immune evasion displayed particularly high  
502 expression in the lung stage, moderately high expression in adult stages and lower expression in  
503 the liver stages. In particular, a previously uncharacterised gene annotated as a hypothetical  
504 protein, with this expression pattern was predicted to be structurally similar to the human

505 complement factor H (CFH), a regulator of the complement cascade. In the mammals, CFH  
506 cleaves C3b, a central protein in the complement cascade (76). The regulatory function of CFH  
507 involves two other molecules - its co-factor complement factor I (CFI) (60) and decay-  
508 accelerating factor (DAF) (59). To date, a *S. mansoni* gene with sequence or structural similarity  
509 to CFI has not been described, but the parasites do possess a serine protease, m28, that cleaves  
510 C3bi (a function normally carried out by CFI (59,77)). For DAF, a native *S. mansoni* form has not  
511 been reported but schistosomes can acquire DAF from host blood cells (78,79). Given the nature  
512 of other genes sharing its expression pattern, the structural match to human CFH, and its  
513 phylogenetic relationship, it is tempting to speculate that the CFH-like gene in schistosome may  
514 have a role in immunomodulation. Nevertheless, host immune system proteins have been  
515 shown to interact with schistosomes in their developmental signalling pathways (80). CFH in  
516 mammals not only cleaves C3b, but also has been implicated in lymphocyte extracellular  
517 secretion and DNA synthesis (80). In addition, schistosomes have a 130 kDa surface protein that  
518 can bind to C3, inactivating the C3 complement-activation, and the binding stimulates renewal  
519 of the parasite surface membrane (76,81). To have another, CFH-like protein identified here,  
520 inhibiting the downstream product of C3 activation, may seem redundant. However, its  
521 potential roles in immunomodulation should not be ruled out. It is common for pathways to  
522 have regulators at various steps, particularly for C3 which is focal for complement cascade  
523 activation and is involved in clearing *S. mansoni* after praziquantel administration (76,82).

524         The data produced from this study will serve as a unique resource for the research  
525 community to explore changes across intra-mammalian stages of schistosome development.  
526 Our particular focus on the lung stage demonstrated consistency with previous observations  
527 and introduced potential new players in host-parasite interactions and parasite development.  
528 Further investigation and functional validation of genes identified here will help decipher  
529 mechanisms for parasite long-term survival within the mammalian host, exposing  
530 vulnerabilities that can be exploited to develop new control strategies for this neglected tropical  
531 pathogen.

## 532 Acknowledgement

533 We thank Prof Karl Hoffmann and Dr Cinzia Cantacessi for their comments on the study  
534 and the first version of this manuscript. We thank multiple members of the Parasite Genomics  
535 team at the Wellcome Sanger Institute for their comments and input for the experimental  
536 design and analysis; in particular, we thank Drs Hayley Bennett, Lia Chappell, James Cotton,  
537 Stephen Doyle, Magda Lotkowska, Thomas Otto, Kate Rawlinson, Adam Reid, and Gavin  
538 Rutledge. The infrastructure used for the analysis is maintained by the core IT Service and the  
539 Pathogen Informatics teams at the Wellcome Sanger Institute.

## 540 References

- 541 1. Gryseels B, Polman K, Clerinx J, Kestens L. Human schistosomiasis. *Lancet*. 2006  
542 Sep;368(9541):1106–18.
- 543 2. Crellen T, Walker M, Lamberton PHL, Kabatereine NB, Tukahebwa EM, Cotton JA, et al.  
544 Reduced efficacy of praziquantel against *Schistosoma mansoni* is associated with multiple  
545 rounds of mass drug administration. *Clinical Infectious Diseases*. 2016 Jul 28;63(9):1151–  
546 1159.
- 547 3. Clegg JA. *In vitro* cultivation of *Schistosoma mansoni*. *Experimental Parasitology*.  
548 1965;16(2):133–147.
- 549 4. Georgi JR, Wade SE, Dean DA. Attrition and temporal distribution of *Schistosoma mansoni*  
550 and *S. haematobium* schistosomula in laboratory mice. *Parasitology*. 1986 Apr;93(1):55.
- 551 5. Wilson RA. The saga of schistosome migration and attrition. *Parasitology*.  
552 2009;136(12):1581–1592.
- 553 6. Crabtree JE, Wilson RA. The role of pulmonary cellular reactions in the resistance of  
554 vaccinated mice to *Schistosoma mansoni*. *Parasite Immunology*. 1986 May;8(3):265–285.



- 555 7. Dean DA, Mangold BL. Evidence that both normal and immune elimination of *Schistosoma*  
556 *mansoni* take place at the lung stage of migration prior to parasite death. *Am J Trop Med*  
557 *Hyg.* 1992;47(2):238–248.
- 558 8. Chai M, McManus DP, McInnes R, Moertel L, Tran M, Loukas A, et al. Transcriptome  
559 profiling of lung schistosomula, *in vitro* cultured schistosomula and adult *Schistosoma*  
560 *japonicum*. *Cellular and Molecular Life Sciences.* 2006 Mar;63(7):919–929.
- 561 9. Jolly ER, Chin C-S, Miller S, Bahgat MM, Lim KC, DeRisi J, et al. Gene expression patterns  
562 during adaptation of a helminth parasite to different environmental niches. *Genome*  
563 *biology.* 2007 Jan;8(4):R65.
- 564 10. Fitzpatrick JM, Peak E, Perally S, Chalmers IW, Barrett J, Yoshino TP, et al. Anti-  
565 schistosomal intervention targets identified by lifecycle transcriptomic analyses. *PLoS*  
566 *Neglected Tropical Diseases.* 2009 Jan;3(11):e543.
- 567 11. Gobert GN, Moertel L, Brindley PJ, McManus DP. Developmental gene expression profiles of  
568 the human pathogen *Schistosoma japonicum*. *BMC Genomics.* 2009;10:128.
- 569 12. Parker-Manuel SJ, Ivens AC, Dillon GP, Wilson RA. Gene expression patterns in larval  
570 *Schistosoma mansoni* associated with infection of the mammalian host. *PLoS Neglected*  
571 *Tropical Diseases.* 2011 Aug;5(8):e1274.
- 572 13. Tucker MS, Karunaratne LB, Lewis FA, Freitas TC, Liang Y. Schistosomiasis. In: Coligan JE,  
573 Bierer BE, Margulies DH, Shevach EM, Strober W, editors. *Current Protocols in*  
574 *Immunology.* Hoboken, NJ, USA: John Wiley & Sons, Inc.; 2013. p. 19.1.1-19.1.58. Available  
575 from: <http://doi.wiley.com/10.1002/0471142735.im1901s103> Cited [cited 8 July 2019]
- 576 14. Basch PF. Cultivation of *Schistosoma mansoni in vitro*. I. Establishment of cultures from  
577 cercariae and development until pairing. *The Journal of Parasitology.* 1981 Apr;67(2):179–  
578 85.
- 579 15. Protasio AV, Tsai IJ, Babbage A, Nichol S, Hunt M, Aslett MA, et al. A systematically  
580 improved high quality genome and transcriptome of the human blood fluke *Schistosoma*  
581 *mansoni*. *PLoS Neglected Tropical Diseases.* 2012;6(1).

- 582 16. Howe KL, Bolt BJ, Shafie M, Kersey P, Berriman M. WormBase ParaSite – a comprehensive  
583 resource for helminth genomics. *Molecular and Biochemical Parasitology*. 2017 Jul;215:2–  
584 10.
- 585 17. Kim D, Pertea G, Trapnell C, Pimentel H, Kelley R, Salzberg SL. TopHat2: accurate  
586 alignment of transcriptomes in the presence of insertions, deletions and gene fusions.  
587 *Genome Biology*. 2013;14(4):R36.
- 588 18. Li H, Handsaker B, Wysoker A, Fennell T, Ruan J, Homer N, et al. The Sequence  
589 Alignment/Map format and SAMtools. *Bioinformatics (Oxford, England)*. 2009  
590 Aug;25(16):2078–9.
- 591 19. Anders S, Pyl PT, Huber W. HTSeq-a Python framework to work with high-throughput  
592 sequencing data. *Bioinformatics*. 2015 Jan 15;31(2):166–169.
- 593 20. RStudio Team. RStudio: Integrated Development for R [Internet]. Boston, MA: RStudio,  
594 Inc.; 2016. Available from: <http://www.rstudio.com/>.
- 595 21. R Core Team. R: A Language and Environment for Statistical Computing [Internet]. Vienna,  
596 Austria: R Foundation for Statistical Computing; 2016. Available from: [https://www.R-](https://www.R-project.org/)  
597 [project.org/](https://www.R-project.org/)
- 598 22. Love MI, Huber W, Anders S. Moderated estimation of fold change and dispersion for RNA-  
599 seq data with DESeq2. *Genome Biology*. 2014 Dec 5;15(12):550.
- 600 23. Benjamini Y, Drai D, Elmer G, Kafkafi N, Golani I. Controlling the false discovery rate in  
601 behavior genetics research. *Behav Brain Res*. 2001 Nov 1;125(1):279–284.
- 602 24. Wehrens R, Buydens LMC. Self- and Super-organising maps in R: the kohonen package. *J*  
603 *Stat Softw*. 2007;21(5).
- 604 25. Alexa A, Rahnenfuhrer J. topGO: Enrichment Analysis for Gene Ontology. 2016. DOI:  
605 10.18129/B9.bioc.topGO
- 606 26. Zhang Y. I-TASSER server for protein 3D structure prediction. *BMC Bioinformatics*. 2008  
607 Jan 23;9:40.

- 608 27. Roy A, Kucukural A, Zhang Y. I-TASSER: a unified platform for automated protein structure  
609 and function prediction. *Nat Protoc.* 2010 Apr;5(4):725–738.
- 610 28. Yang J, Yan R, Roy A, Xu D, Poisson J, Zhang Y. The I-TASSER Suite: protein structure and  
611 function prediction. *Nat Methods.* 2015 Jan;12(1):7–8.
- 612 29. Berman HM, Westbrook J, Feng Z, Gilliland G, Bhat TN, Weissig H, et al. The Protein Data  
613 Bank. *Nucleic Acids Res.* 2000 Jan 1;28(1):235–242.
- 614 30. Pettersen EF, Goddard TD, Huang CC, Couch GS, Greenblatt DM, Meng EC, et al. UCSF  
615 Chimera—a visualization system for exploratory research and analysis. *J Comput Chem.*  
616 2004 Oct;25(13):1605–12.
- 617 31. Finn RD, Attwood TK, Babbitt PC, Bateman A, Bork P, Bridge AJ, et al. InterPro in 2017—  
618 beyond protein family and domain annotations. *Nucleic Acids Research.* 2017 Jan  
619 4;45(D1):D190–D199.
- 620 32. Sillitoe I, Lewis TE, Cuff A, Das S, Ashford P, Dawson NL, et al. CATH: comprehensive  
621 structural and functional annotations for genome sequences. *Nucleic Acids Research.* 2015  
622 Jan 28;43(D1):D376–D381.
- 623 33. Miller P, Wilson RA. Migration of the schistosomula of *Schistosoma mansoni* from the lungs  
624 to the hepatic portal system. *Parasitology.* 1980;80:267–288.
- 625 34. Lawson JR, Wilson RA. Metabolic changes associated with the migration of the  
626 schistosomulum of *Schistosoma mansoni* in the mammal host. *Parasitology.* 1980  
627 Oct;81(2):325–36.
- 628 35. Krautz-Peterson G, Simoes M, Faghiri Z, Ndegwa D, Oliveira G, Shoemaker CB, et al.  
629 Suppressing glucose transporter gene expression in schistosomes impairs parasite feeding  
630 and decreases survival in the mammalian host. *PLoS Pathogens.* 2010;6(6).
- 631 36. Delcroix M, Sajid M, Caffrey CR, Lim K-C, Dvorák J, Hsieh I, et al. A multienzyme network  
632 functions in intestinal protein digestion by a platyhelminth parasite. *J Biol Chem.* 2006 Dec  
633 22;281(51):39316–39329.

- 634 37. Fitzpatrick JM, Hirai Y, Hirai H, Hoffmann KF. Schistosome egg production is dependent  
635 upon the activities of two developmentally regulated tyrosinases. *The FASEB Journal*. 2007  
636 Mar;21(3):823–35.
- 637 38. Buro C, Oliveira KC, Lu Z, Leutner S, Beckmann S, Dissous C, et al. Transcriptome analyses  
638 of inhibitor-treated schistosome females provide evidence for cooperating Src-kinase and  
639 TGF $\beta$  receptor pathways controlling mitosis and eggshell formation. *PLoS Pathogens*.  
640 2013;9(6):e1003448.
- 641 39. Kamachi Y, Kondoh H. Sox proteins: regulators of cell fate specification and differentiation.  
642 *Development*. 2013 Oct;140(20):4129–44.
- 643 40. Paulson AF, Prasad MS, Thuringer AH, Manzerra P. Regulation of cadherin expression in  
644 nervous system development. *Cell Adh Migr*. 2014;8(1):19–28.
- 645 41. Park WJ, Liu J, Adler PN. Frizzled gene expression and development of tissue polarity in the  
646 *Drosophila* wing. *Dev Genet*. 1994;15(4):383–389.
- 647 42. Logan CY, Nusse R. The Wnt signaling pathway in development and disease. *Annu Rev Cell*  
648 *Dev Biol*. 2004;20:781–810.
- 649 43. Tsuda M, Sasaoka Y, Kiso M, Abe K, Haraguchi S, Kobayashi S, et al. Conserved role of nanos  
650 proteins in germ cell development. *Science*. 2003 Aug 29;301(5637):1239–41.
- 651 44. Smyth DJ, Glanfield A, McManus DP, Hacker E, Blair D, Anderson GJ, et al. Two isoforms of a  
652 divalent metal transporter (dmt1) in *Schistosoma mansoni* suggest a surface-associated  
653 pathway for iron absorption in schistosomes. *Journal of Biological Chemistry*. 2006  
654 Jan;281(4):2242–2248.
- 655 45. Glanfield A, McManus DP, Anderson GJ, Jones MK. Pumping iron: a potential target for  
656 novel therapeutics against schistosomes. *Trends in Parasitology*. 2007 Dec;23(12):583–8.
- 657 46. Berriman M, Haas BJ, LoVerde PT, Wilson RA, Dillon GP, Cerqueira GC, et al. The genome of  
658 the blood fluke *Schistosoma mansoni*. *Nature*. 2009 Jul 16;460(7253):352–8.

- 659 47. Tsai IJ, Zarowiecki M, Holroyd N, Garcarrubio A, Sanchez-Flores A, Brooks KL, et al. The  
660 genomes of four tapeworm species reveal adaptations to parasitism. *Nature*. 2013 Mar  
661 13;496(7443):57–63.
- 662 48. DeMarco R, Mathieson W, Manuel SJ, Dillon GP, Curwen RS, Ashton PD, et al. Protein  
663 variation in blood-dwelling schistosome worms generated by differential splicing of  
664 micro-exon gene transcripts. *Genome research*. 2010 Aug;20(8):1112–21.
- 665 49. Orcia D, Zeraik AE, Lopes JLS, Macedo JNA, Santos CR dos, Oliveira KC, et al. Interaction of  
666 an esophageal MEG protein from schistosomes with a human S100 protein involved in  
667 inflammatory response. *Biochimica et Biophysica Acta (BBA) - General Subjects*. 2017  
668 Jan;1861(1):3490–7.
- 669 50. Wilson RA, Li XH, MacDonald S, Neves LX, Vitoriano-Souza J, Leite LCC, et al. The  
670 schistosome esophagus is a ‘hotspot’ for microexon and lysosomal hydrolase gene  
671 expression: Implications for blood processing. Ribeiro JMC, editor. *PLOS Neglected  
672 Tropical Diseases*. 2015 Dec 7;9(12):e0004272.
- 673 51. Afonso V, Champy R, Mitrovic D, Collin P, Lomri A. Reactive oxygen species and superoxide  
674 dismutases: Role in joint diseases. *Joint Bone Spine*. 2007 Jul;74(4):324–329.
- 675 52. Kwatia MA, Botkin DJ, Williams DL. Molecular and enzymatic characterization of  
676 *Schistosoma mansoni* thioredoxin peroxidase. *The Journal of parasitology*.  
677 2000;86(5):908–915.
- 678 53. Prast-Nielsen S, Huang H-H, Williams DL. Thioredoxin glutathione reductase: Its role in  
679 redox biology and potential as a target for drugs against neglected diseases. *Biochimica et  
680 Biophysica Acta (BBA) - General Subjects*. 2011 Dec;1810(12):1262–71.
- 681 54. Ranasinghe SL, Fischer K, Gobert GN, McManus DP. Functional expression of a novel Kunitz  
682 type protease inhibitor from the human blood fluke *Schistosoma mansoni*. *Parasites &  
683 Vectors*. 2015 Aug 4;8(1):408.
- 684 55. Fitzpatrick JM, Fuentes JM, Chalmers IW, Wynn TA, Modolell M, Hoffmann KF, et al.  
685 *Schistosoma mansoni* arginase shares functional similarities with human orthologs but

- 686 depends upon disulphide bridges for enzymatic activity. *Int J Parasitol.* 2009  
687 Feb;39(3):267–279.
- 688 56. Hai Y, Edwards JE, Van Zandt MC, Hoffmann KF, Christianson DW. Crystal structure of  
689 *Schistosoma mansoni* arginase, a potential drug target for the treatment of schistosomiasis.  
690 *Biochemistry.* 2014;53(28):4671–4684.
- 691 57. Nowacki FC, Swain MT, Klychnikov OI, Niazi U, Ivens A, Quintana JF, et al. Protein and small  
692 non-coding RNA-enriched extracellular vesicles are released by the pathogenic blood fluke  
693 *Schistosoma mansoni*. *Journal of Extracellular Vesicles.* 2015;4:1–16.
- 694 58. Okemefuna AI, Nan R, Gor J, Perkins SJ. Electrostatic interactions contribute to the folded-  
695 back conformation of wild type human factor H. *Journal of Molecular Biology.* 2009  
696 Aug;391(1):98–118.
- 697 59. Morgan HP, Schmidt CQ, Guariento M, Blaum BS, Gillespie D, Herbert AP, et al. Structural  
698 basis for engagement by complement factor H of C3b on a self surface. *Nature structural &*  
699 *molecular biology.* 2011;18(4):463–70.
- 700 60. Medjeral-Thomas N, Pickering MC. The complement factor H-related proteins.  
701 *Immunological Reviews.* 2016;274(1):191–201.
- 702 61. Kalenda YDJ, Kato K, Goto Y, Fujii Y, Hamano S. Tandem repeat recombinant proteins as  
703 potential antigens for the sero-diagnosis of *Schistosoma mansoni* infection. *Parasitology*  
704 *International.* 2015 Dec;64(6):503–12.
- 705 62. Sirisinha S, Rattanasiriwilai W, Puengtomwatanakul S, Sobhon P, Saitongdee P,  
706 Koonchornboon T. Complement-mediated killing of *Opisthorchis viverrini* via activation of  
707 the alternative pathway. *Int J Parasitol.* 1986 Aug;16(4):341–346.
- 708 63. Schroeder H, Skelly PJ, Zipfel PF, Losson B, Vanderplasschen A. Subversion of complement  
709 by hematophagous parasites. *Developmental & Comparative Immunology.* 2009  
710 Jan;33(1):5–13.

- 711 64. Vilella AJ, Severin J, Ureta-Vidal A, Heng L, Durbin R, Birney E. EnsemblCompara  
712 GeneTrees: Complete, duplication-aware phylogenetic trees in vertebrates. *Genome Res.*  
713 2009 Feb;19(2):327–335.
- 714 65. Crabtree JE, Wilson RA. *Schistosoma mansoni*: an ultrastructural examination of pulmonary  
715 migration. *Parasitology.* 1986 Apr;92 ( Pt 2):343–54.
- 716 66. Kusel JR, Al-Adhami BH, Doenhoff MJ. The schistosome in the mammalian host:  
717 understanding the mechanisms of adaptation. *Parasitology.* 2007 Oct;134(Pt 11):1477–  
718 526.
- 719 67. Dillon GP, Feltwell T, Skelton J, Coulson PS, Wilson RA, Ivens AC. Altered patterns of gene  
720 expression underlying the enhanced immunogenicity of radiation-attenuated  
721 schistosomes. *PLoS neglected tropical diseases.* 2008 Jan;2(5):e240.
- 722 68. Mastin A, Bickle QD, Wilson RA. An ultrastructural examination of irradiated, immunizing  
723 schistosomula of *Schistosoma mansoni* during their extended stay in the lungs.  
724 *Parasitology.* 1985 Aug;91 ( Pt 1):101–110.
- 725 69. Mebius MM, van Genderen PJJ, Urbanus RT, Tielens AGM, de Groot PG, van Hellemond JJ.  
726 Interference with the host haemostatic system by schistosomes. *PLoS Pathogens.* 2013  
727 Jan;9(12):e1003781.
- 728 70. Bentley AG, Carlisle AS, Phillips SM. Ultrastructural analysis of the cellular response to  
729 *Schistosoma mansoni*. II. Inflammatory response in rodent skin. *The American Journal of*  
730 *Tropical Medicine and Hygiene.* 1981;30(4):815–824.
- 731 71. McLaren DJ, Terry RJ. The protective role of acquired host antigens during schistosome  
732 maturation. *Parasite Immunology.* 1982;4:129–148.
- 733 72. Burke ML, McGarvey L, McSorley HJ, Bielefeldt-Ohmann H, McManus DP, Gobert GN.  
734 Migrating *Schistosoma japonicum* schistosomula induce an innate immune response and  
735 wound healing in the murine lung. *Molecular immunology.* 2011 Oct;49(1):191–200.
- 736 73. Hernández-Goenaga J, López-Abán J, Protasio AV, Vicente Santiago B, del Olmo E, Vanegas  
737 M, et al. Peptides derived of kunitz-type serine protease inhibitor as potential vaccine

- 738 against experimental schistosomiasis. bioRxiv [Internet]. 2019 May 10 [cited 2019 Aug  
739 14]; Available from: <http://biorxiv.org/lookup/doi/10.1101/634360>
- 740 74. Dirks RC, Faiman MD. Free radical formation and lipid peroxidation in rat and mouse  
741 cerebral cortex slices exposed to high oxygen pressure. *Brain Research*. 1982  
742 Sep;248(2):355–360.
- 743 75. Kobayashi-Miura M, Shioji K, Hoshino Y, Masutani H, Nakamura H, Yodoi J. Oxygen sensing  
744 and redox signaling: the role of thioredoxin in embryonic development and cardiac  
745 diseases. *Am J Physiol Heart Circ Physiol*. 2007 May;292(5):H2040–2050.
- 746 76. Skelly PJ. Intravascular schistosomes and complement. *Trends in Parasitology*. 2004  
747 Aug;20(8):370–4.
- 748 77. Fishelson Z. Novel mechanisms of immune evasion by *Schistosoma mansoni*. *Mem Inst*  
749 *Oswaldo Cruz*. 1995 Apr;90(2):289–292.
- 750 78. Horta MF, Ramalho-Pinto FJ. Role of human decay-accelerating factor in the evasion of  
751 *Schistosoma mansoni* from the complement-mediated killing *in vitro*. *The Journal of*  
752 *experimental medicine*. 1991 Dec;174(6):1399–406.
- 753 79. Ramalho-Pinto FJ, Carvalho EM, Horta MF. Mechanisms of evasion of *Schistosoma mansoni*  
754 schistosomula to the lethal activity of complement. *Mem Inst Oswaldo Cruz*. 1992;87 Suppl  
755 4:111–116.
- 756 80. Inal JM. Parasite interaction with host complement: beyond attack regulation. *Trends in*  
757 *Parasitology*. 2004 Sep;20(9):407–12.
- 758 81. Silva EE, Clarke MW, Podesta RB. Characterization of a C3 receptor on the envelope of  
759 *Schistosoma mansoni*. *Journal of Immunology*. 1993;151:7057–7066.
- 760 82. La Flamme AC, MacDonald AS, Huxtable CR, Carroll M, Pearce EJ. Lack of C3 affects Th2  
761 response development and the sequelae of chemotherapy in schistosomiasis. *J Immunol*.  
762 2003 Jan 1;170(1):470–6.
- 763



## 764 **Supporting information**

### 765 **S1 Fig. Clusters of genes based on timecourse expression pattern, with fixed y-axes.**

766 Expression profile of genes differentially expressed in at least one time point clustered into 96  
767 groups. The clustering was done on mean-normalised regularized log transformation (rlog-  
768 transformed) of raw read counts. X-axes represent six time points from this dataset; y-axes  
769 represent the mean-normalised rlog-transformed. Unlike Fig 4, this supplementary figure show  
770 clusters with the fixed range for y-axis across all clusters in order to visualise clusters with the  
771 largest changes over time.

772 **S2 Fig. Expression of genes encoding ferritin-heavy chain over the timecourse.** Each dot  
773 represents one replicate from each of the time points. Y-axis represent normalised counts from  
774 DESeq2.

775 **S3 Fig. Expression of genes encoding putative ferric reductase (cytochrome b 561;  
776 Smp\_136400) and Divalent Metal Transporter (DMT1) (Smp\_099850) over the  
777 timecourse.** Each dot represents one replicate from each of the time points. Y-axis represent  
778 normalised counts from DESeq2.

779 **S4 Fig. Expression of genes encoding two extracellular superoxide dismutases  
780 (Smp\_174810 and Smp\_095980) over the timecourse.** Expression of Smp\_174810 and  
781 Smp\_095980 with y axes on log scale. Each dot represents one replicate from each of the time  
782 points. Y-axis represent normalised counts from DESeq2. Smp\_095980 was identified as  
783 differentially expressed (S2 Table and S4 Fig), but this figure shows that its expression in the  
784 lung stage was high in only one out of seven replicates.

785 **S5 Fig. Expression of genes encoding thioredoxin glutathione reductase over the  
786 timecourse.** Each dot represents one replicate from each of the time points. Y-axis represent  
787 normalised counts from DESeq2. Log<sub>2</sub>FC between D13/D06 is -0.52, adjusted p-value for  
788 differential expression between D13/D06 is 4.09675e-21.

789 **S6 Fig. Expression of genes encoding single Kunitz serine protease inhibitor over the**  
790 **timecourse.** Each dot represents one replicate from each of the time points. Y-axis represent  
791 normalised counts from DESeq2.

792 **S7 Fig. Predicted structure of Smp\_334090 aligned with structure of human CFH.** A)  
793 Predicted 3D structure of Smp\_334090 (a resulting merge of Smp\_182770 and Smp\_038730 in  
794 the most recent version of *S. mansoni* genome; unpublished) by I-TASSER server from the input  
795 amino acid sequence. B) Alignment between the predicted structure (blue) and 3D structure of  
796 human CFH (in 137 mM NaCl buffer) obtained from PDB (PDB identifier: 3GAV) (red).

797 **S1 Table.** Genes that were differentially expressed in at least one time point (likelihood ratio  
798 test, adjusted p-value < 0.01)

799 **S2 Table.** Differentially expressed genes between day-13 and lung stage *S. mansoni*

800 **S3 Table.** Enriched GO terms of genes differentially expressed between day-13 and lung stage *S.*  
801 *mansoni*

802 **S4 Table.** Differentially expressed genes between day-28 and day-21 *S. mansoni*

803 **S5 Table.** Enriched GO terms of genes differentially expressed between day-28 and day-21 *S.*  
804 *mansoni*

805 **S6 Table.** Differentially expressed genes between day-35 and day-28 *S. mansoni*

806 **S7 Table.** Enriched GO terms of genes differentially expressed between day-35 and day-28 *S.*  
807 *mansoni*

808 **S8 Table.** Genes differentially expressed in at least one time point identified by their clustered  
809 expression profiles

810 **S9 Table.** GO term enrichment of genes with high expression during liver stages (genes in  
811 cluster 1, 2, 9, 10, 17, 25, 26, 27, 33, 34)

812 **S10 Table.** GO enrichment of genes up-regulated in lung stage (genes in cluster 8, 24, 32)

813 **S11 Table.** Enriched GO terms of genes with high expression in lung stage followed by a steady  
814 decline toward adult (genes in cluster 5, 6, 7, 13, 14, 15, 16, 21, 22, 23, 31)

815 **S12 Table.** Enriched GO terms of genes with high expression in lung stage, low expression in  
816 liver stages, and increased expression in adult stages (genes in cluster 64, 72)

817 **S13 Table.** Enriched GO terms of genes with high expression in lung stage, low expression in  
818 liver stages, and increased expression in adult stages (genes in cluster 71, 80)

819 **S14 Table.** Enriched GO terms of genes with high expression in lung stage, low expression in  
820 liver stages, and increased expression in adult stages (genes in cluster 64, 71, 72, 80)

821 **S1 File. Modified Basch media components.**

822 **S2 File. Smansoni\_longest\_transcript\_htseq\_friendly.gff.** Genome annotation file used for  
823 generating read counts.

824 **S3 File. Final\_counts.** A zipped folder containing the following files:

825 D06\_SM\_1\_17675\_4\_1.htseq-count.txt

826 D06\_SM\_2\_17675\_4\_2.htseq-count.txt

827 D06\_SM\_3\_17675\_4\_3.htseq-count.txt

828 D06\_SM\_4\_17675\_4\_4.htseq-count.txt

829 D06\_SM\_5\_17675\_4\_5.htseq-count.txt

830 D06\_SM\_6\_17675\_4\_6.htseq-count.txt

831 D06\_SM\_7\_17675\_4\_7.htseq-count.txt

832 D13\_SM\_1\_17675\_4\_8.htseq-count.txt

833 D13\_SM\_2\_17675\_4\_9.htseq-count.txt

834 D13\_SM\_3\_17675\_4\_10.htseq-count.txt

835 D17\_SM\_1\_17675\_4\_11.htseq-count.txt

836 D17\_SM\_2\_17675\_4\_12.htseq-count.txt

837 D17\_SM\_3\_17675\_4\_13.htseq-count.txt

838 D21\_SM\_1\_17675\_4\_14.htseq-count.txt

839 D21\_SM\_2\_17675\_4\_15.htseq-count.txt

840 D21\_SM\_3\_17675\_4\_16.htseq-count.txt

841 D28\_SM\_1\_17675\_4\_17.htseq-count.txt

842 D28\_SM\_2\_17675\_4\_18.htseq-count.txt

843 D28\_SM\_3\_17675\_4\_19.htseq-count.txt

844 D35\_SM\_1\_17675\_4\_20.htseq-count.txt

845 D35\_SM\_2\_17675\_4\_21.htseq-count.txt

846 D35\_SM\_3\_17675\_4\_22.htseq-count.txt

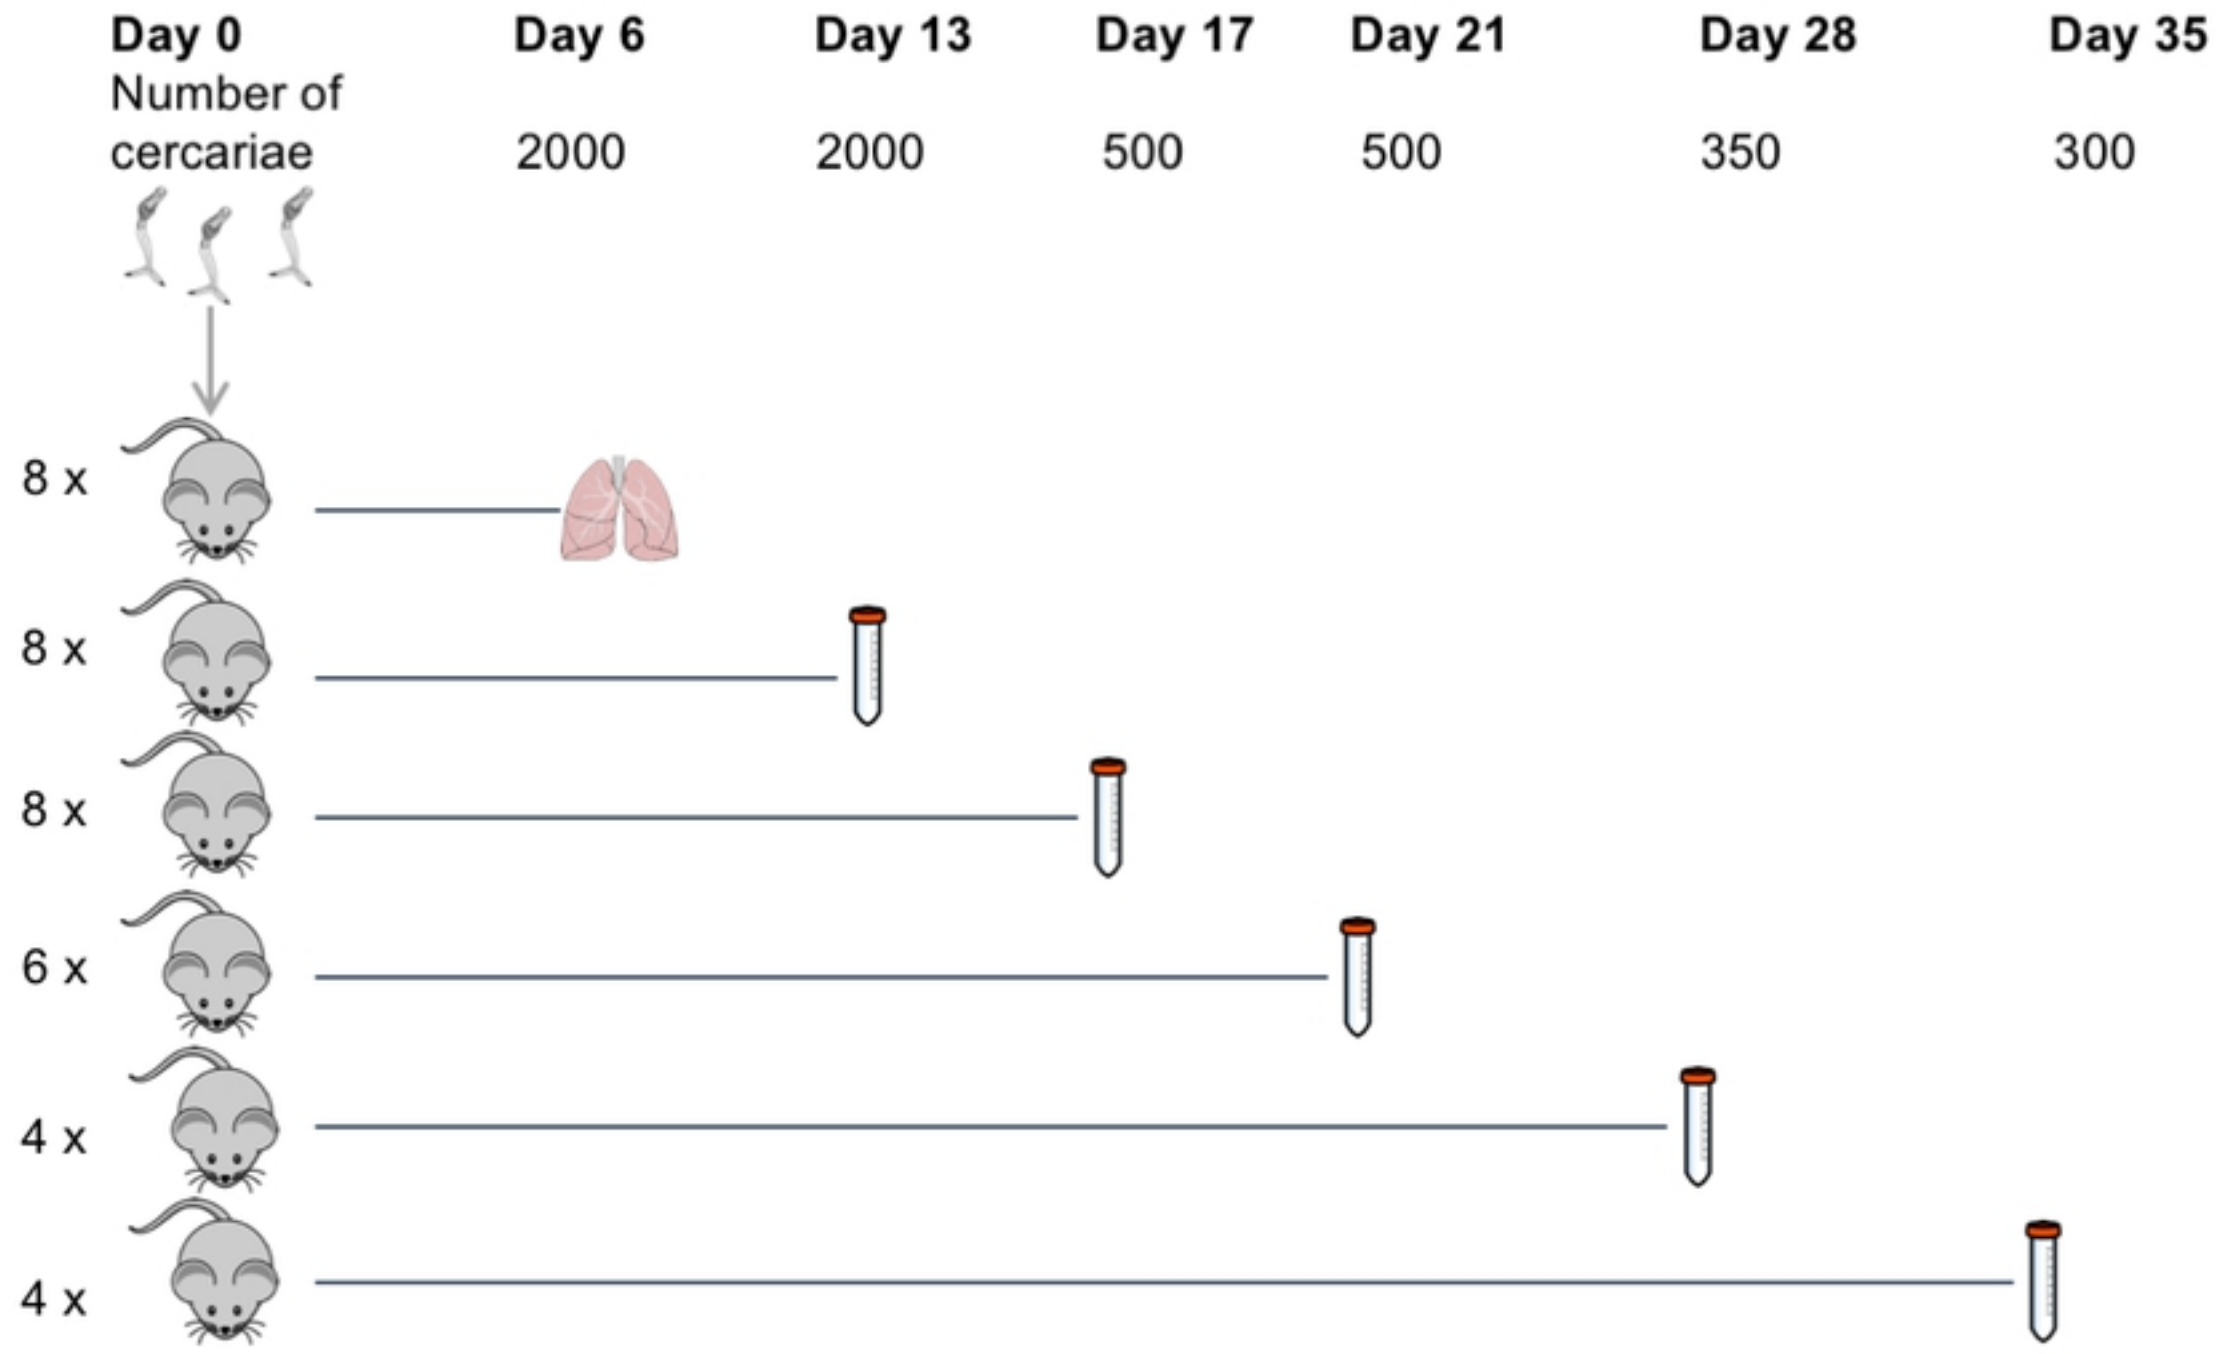

Figure

**A**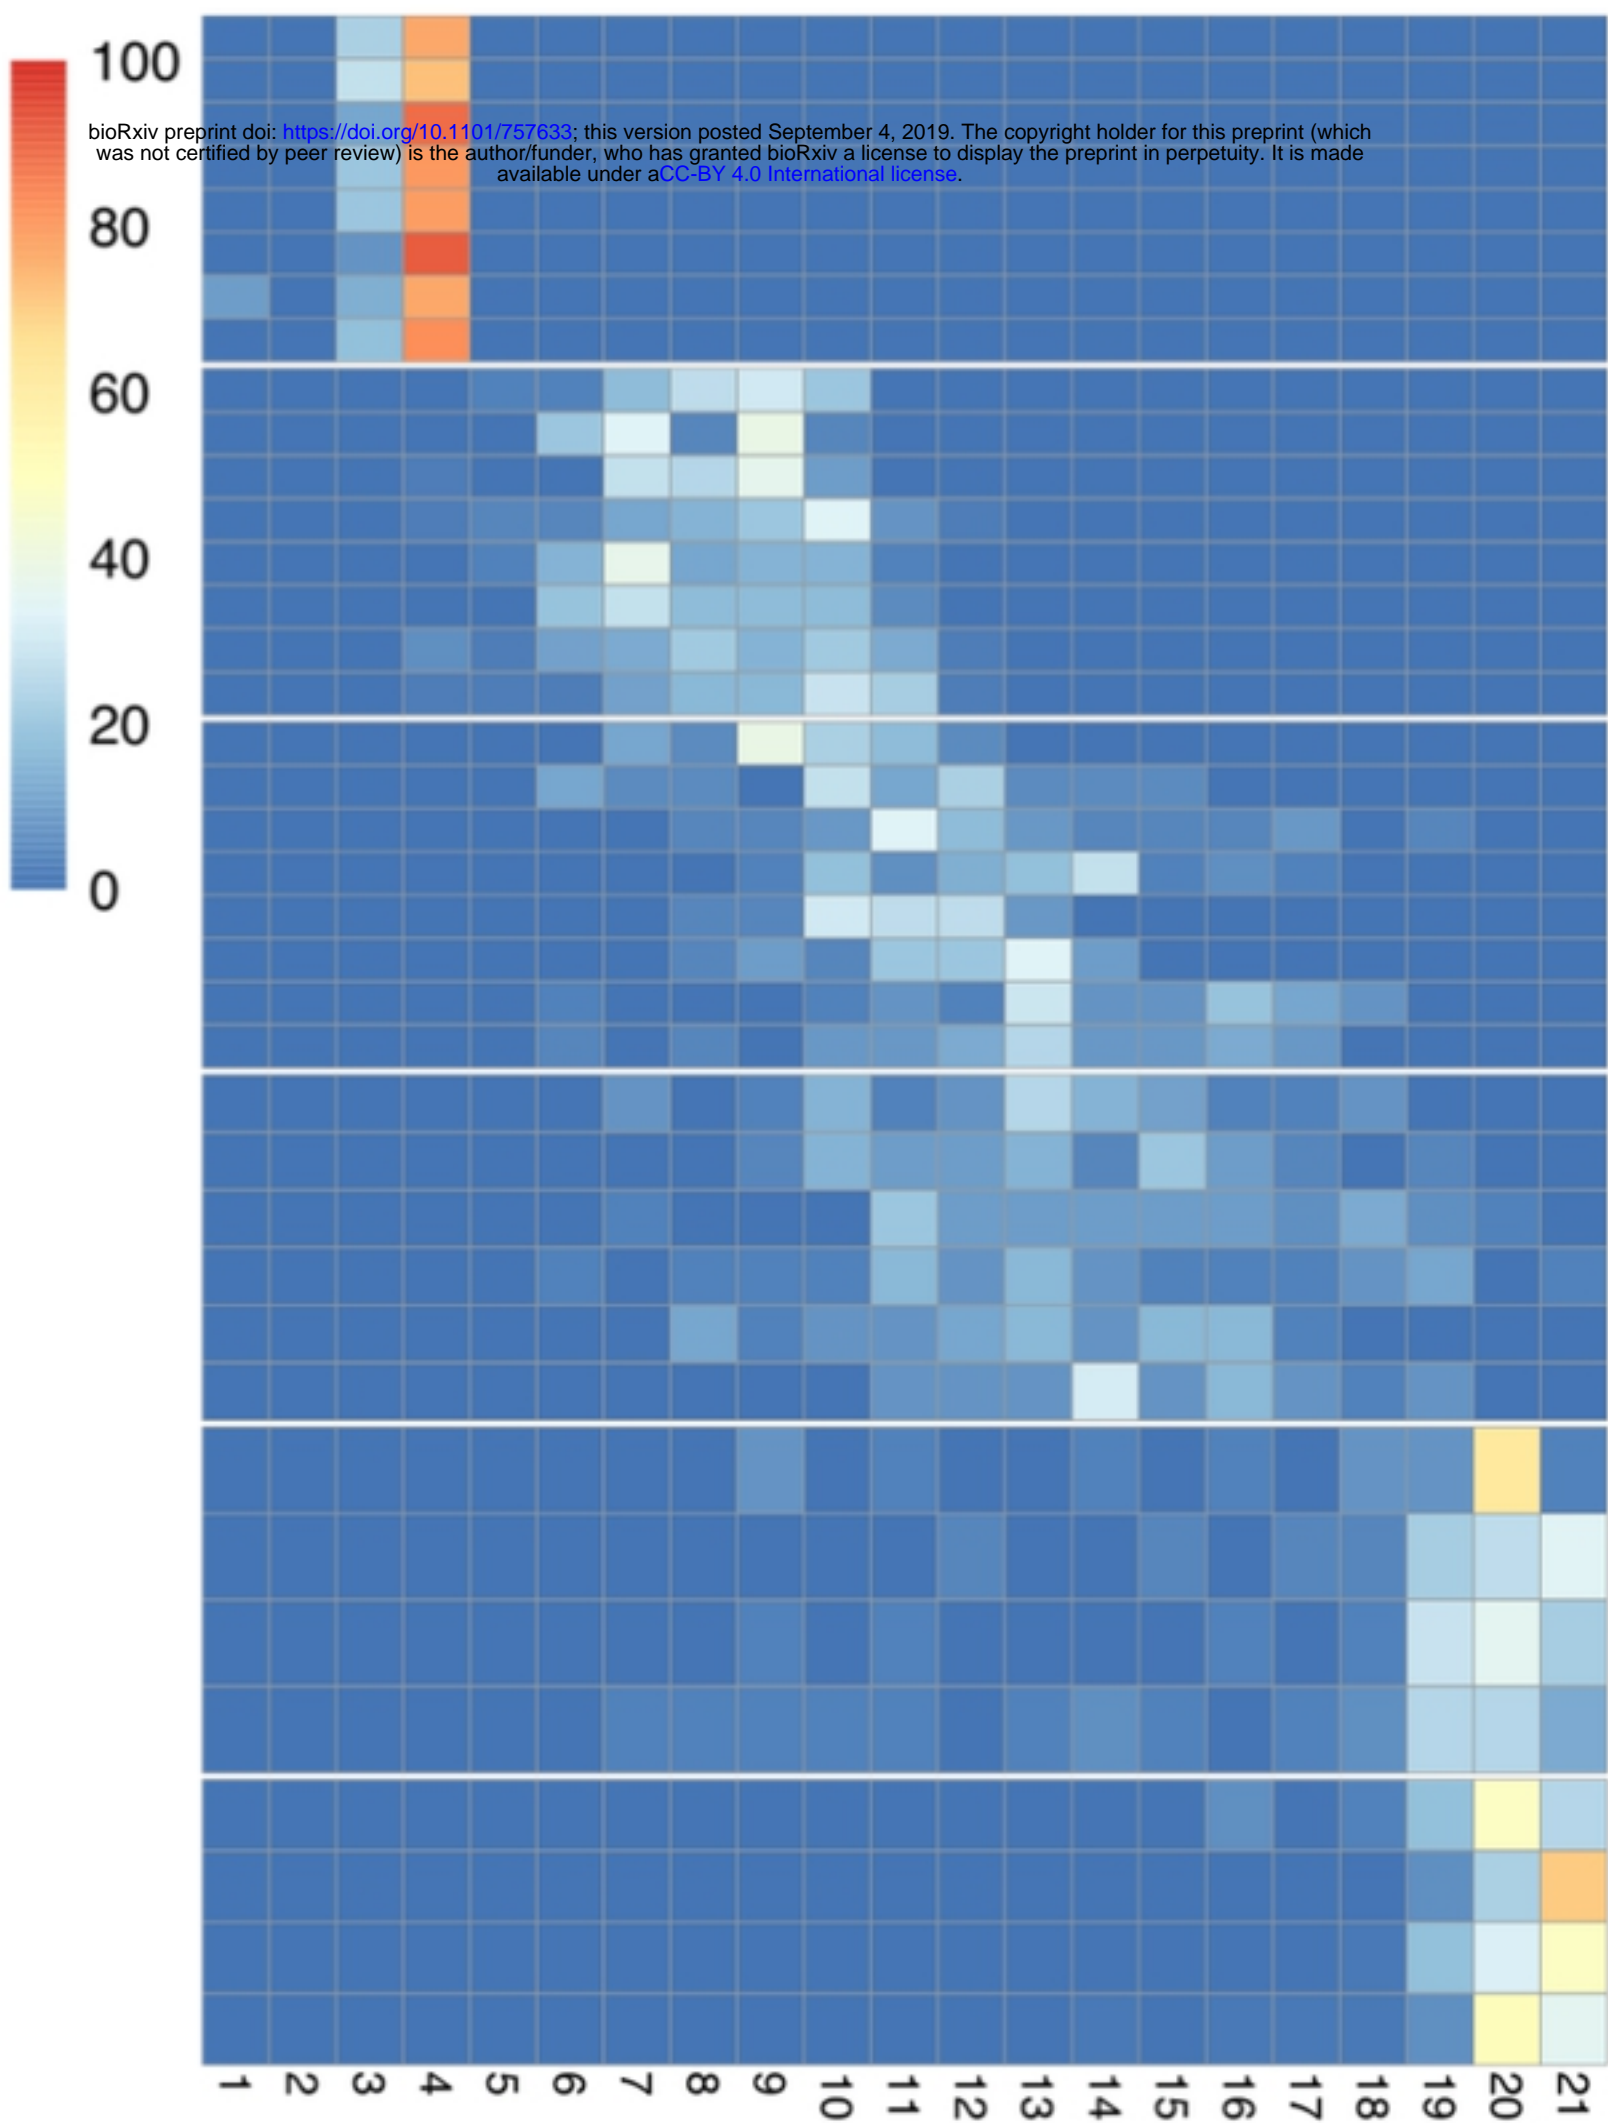**B**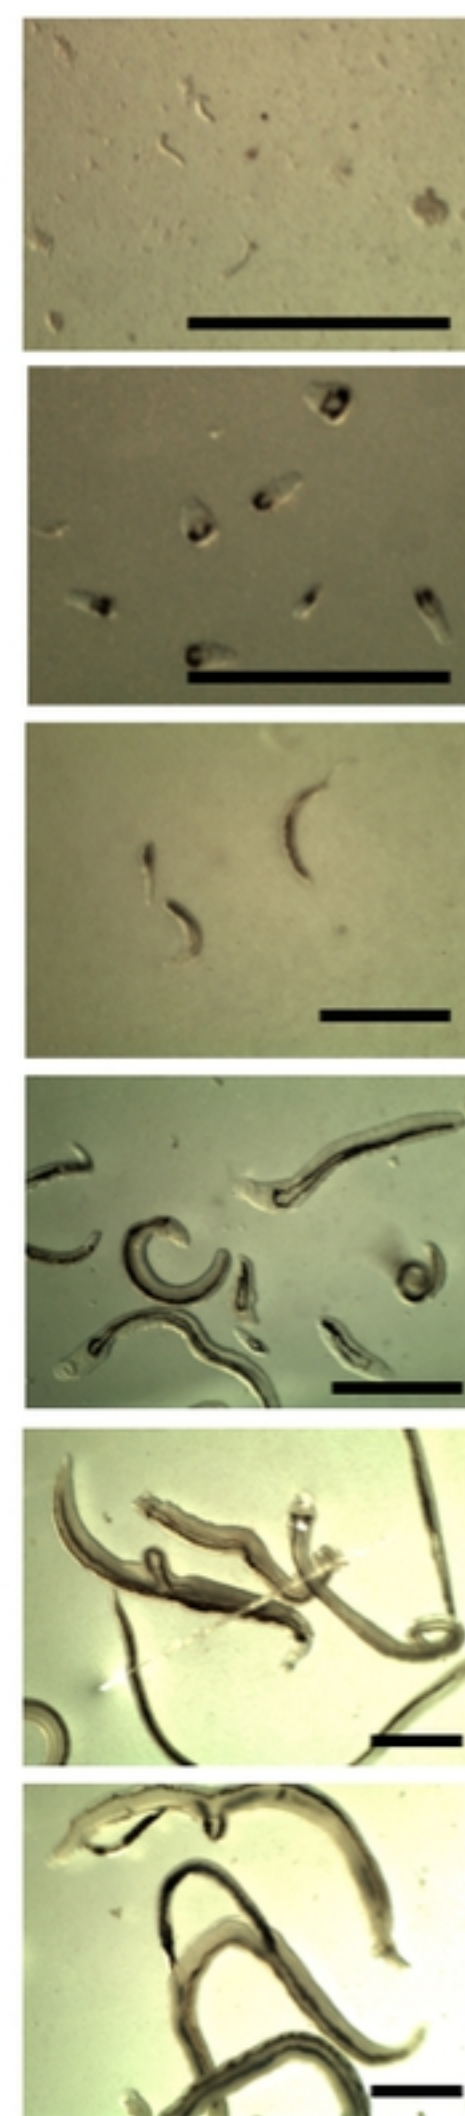

Figure

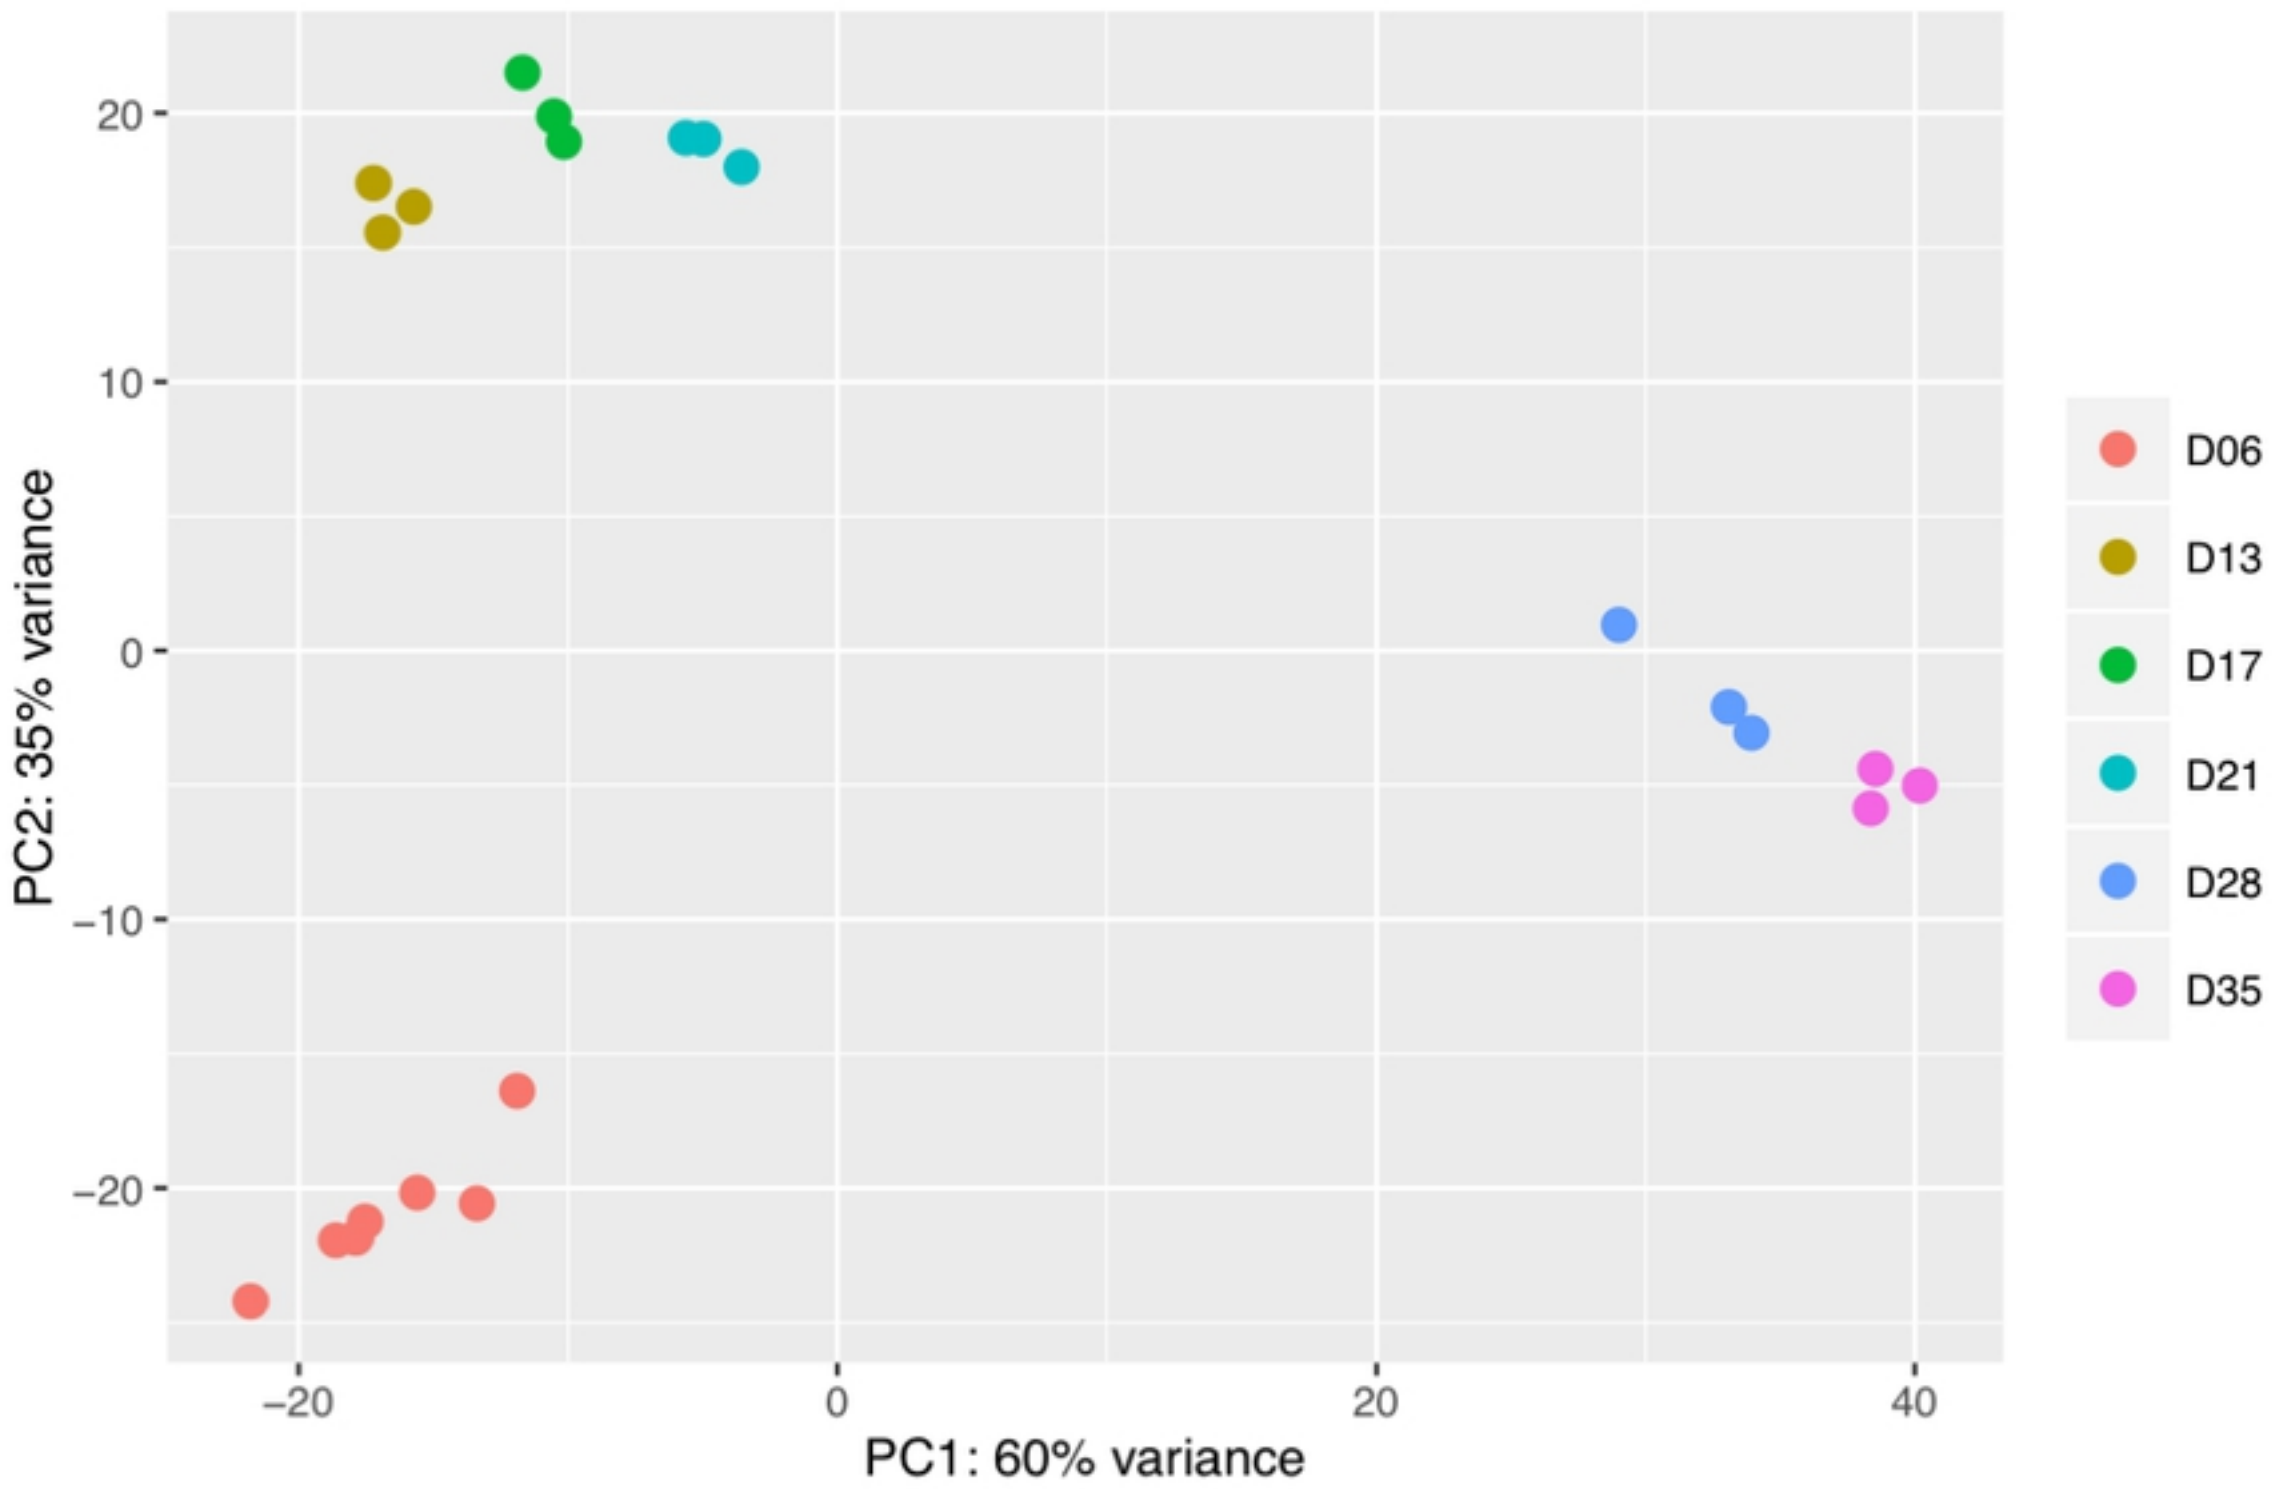

Figure



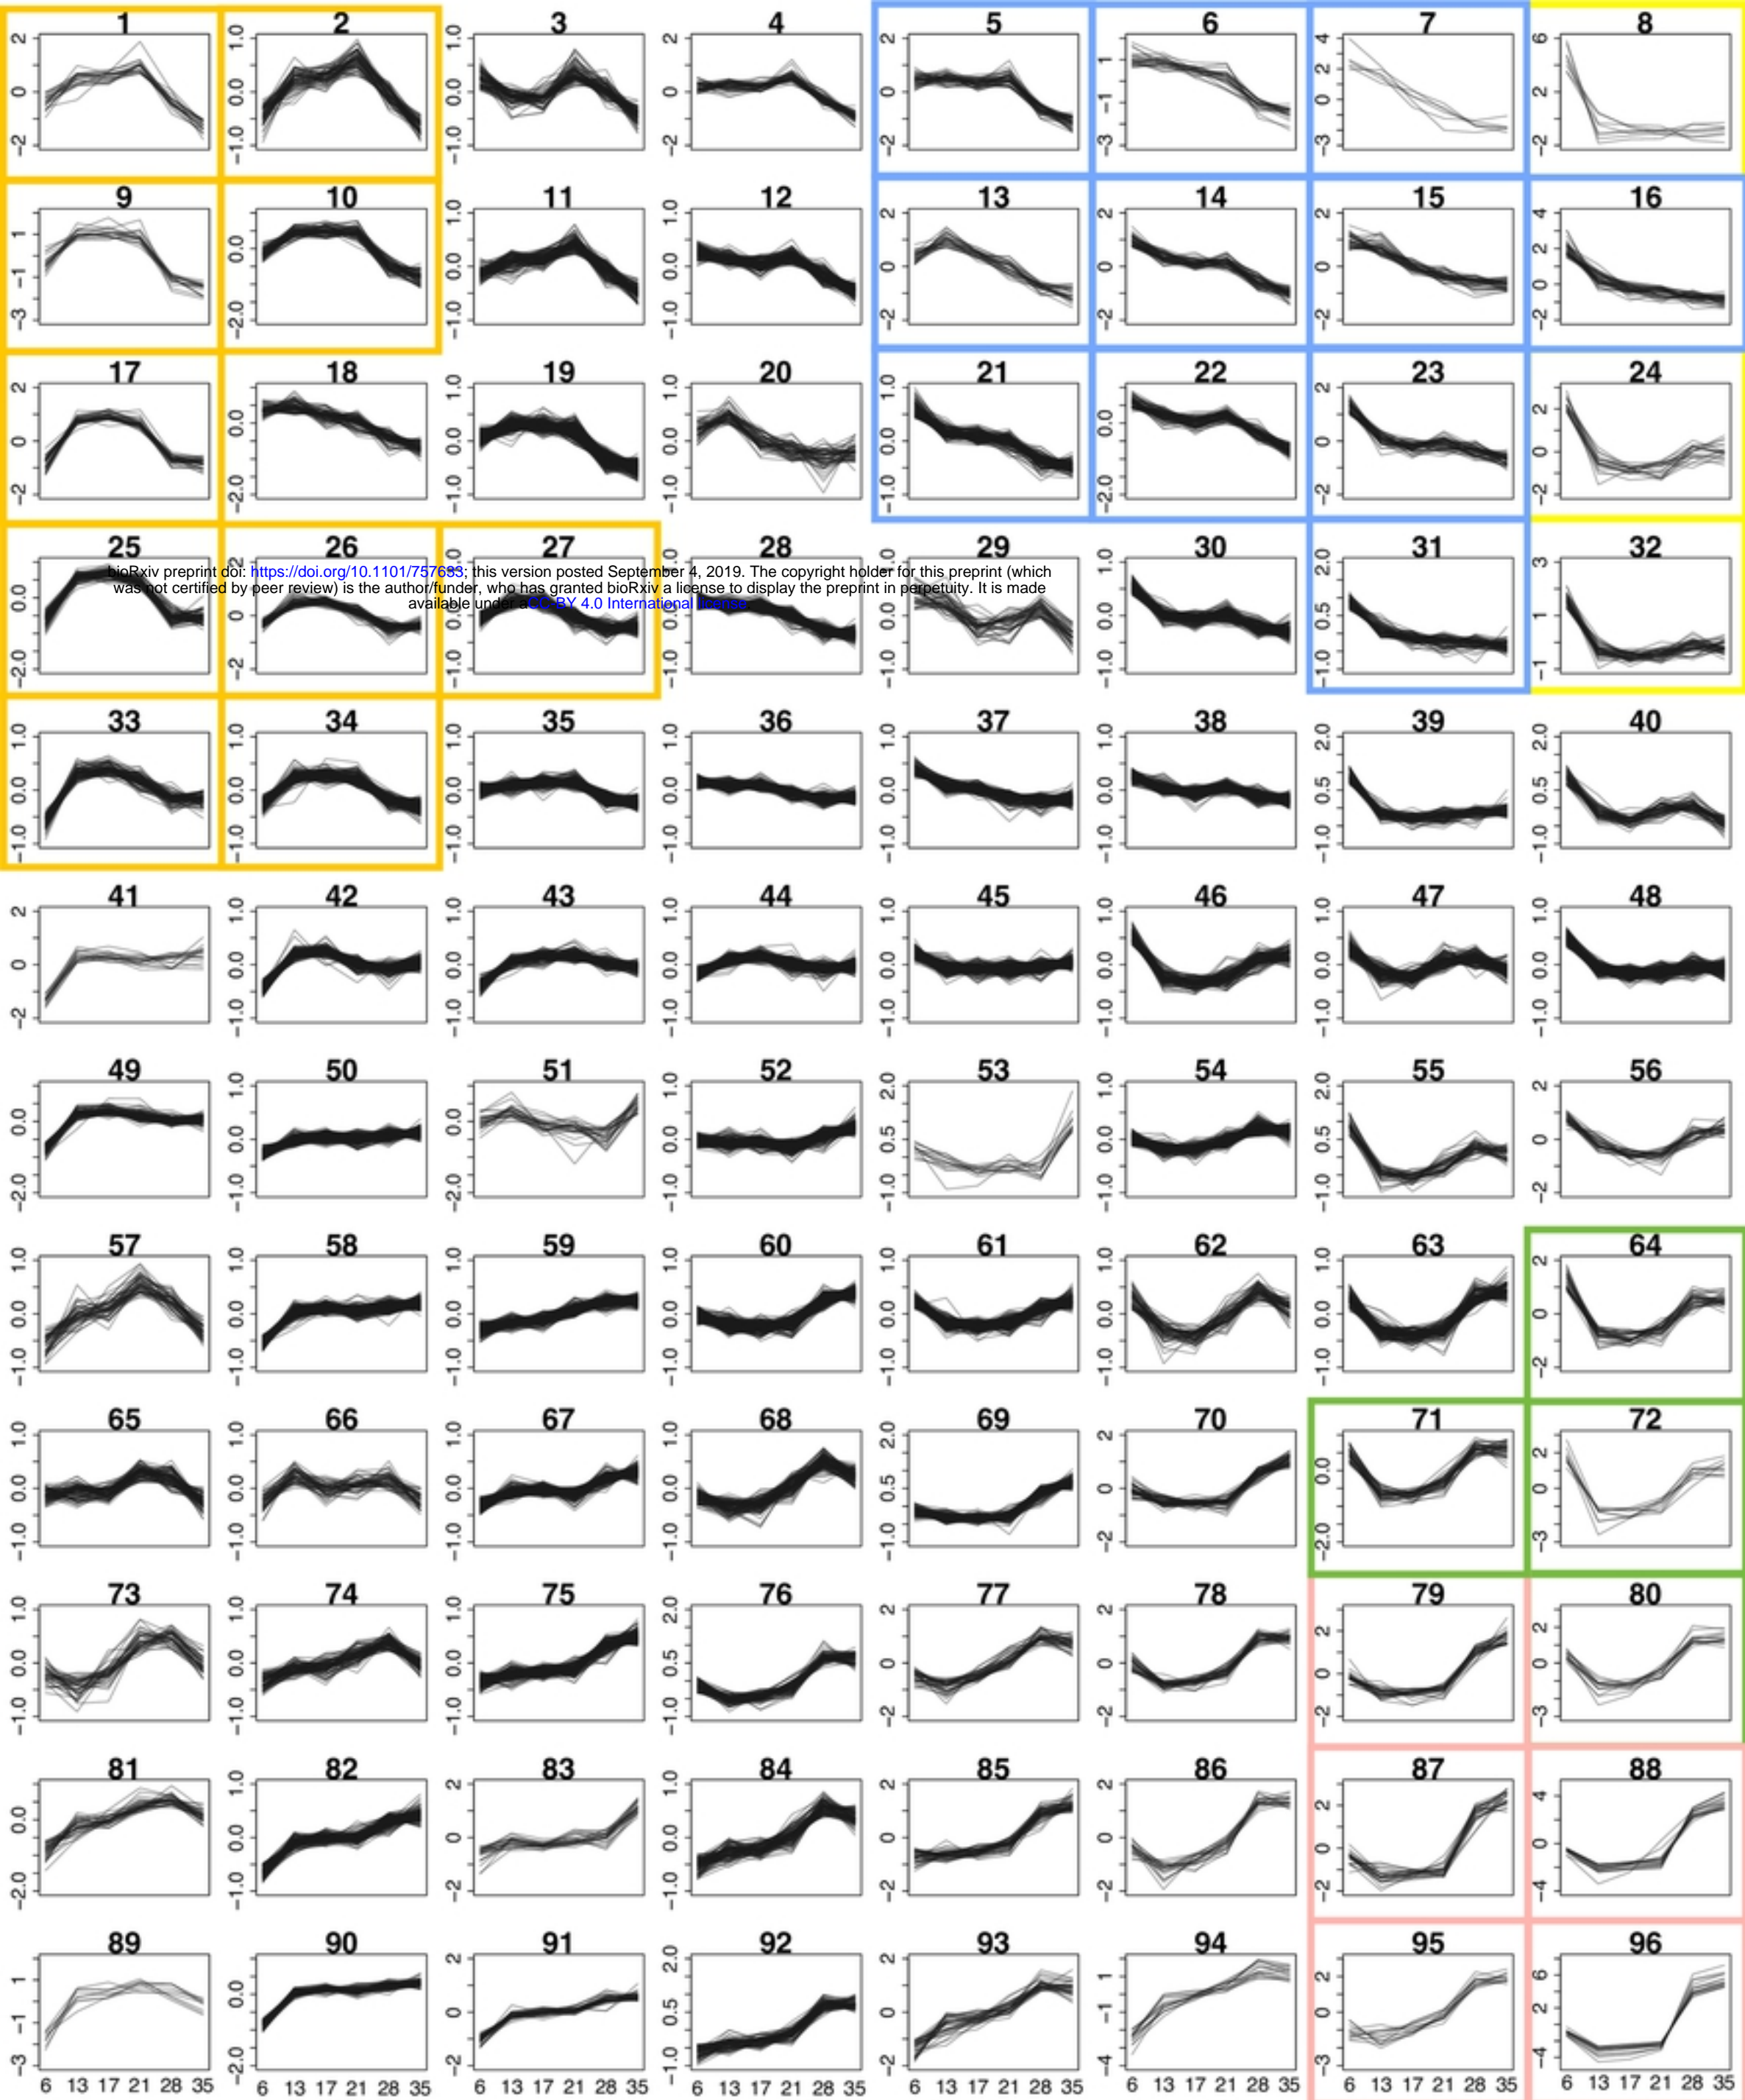

Figure



**A**

Predicted structure of Smp\_182770

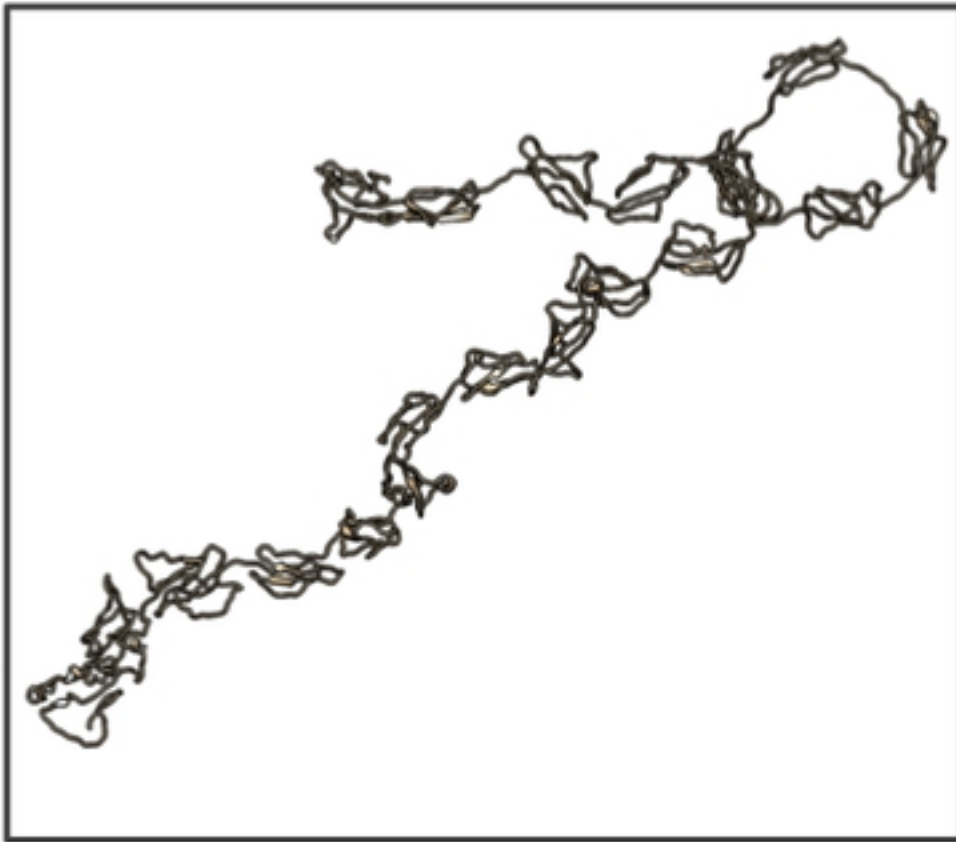**B**

Alignment of Smp\_182770 predicted structure with PDB structure of human CHF in solution

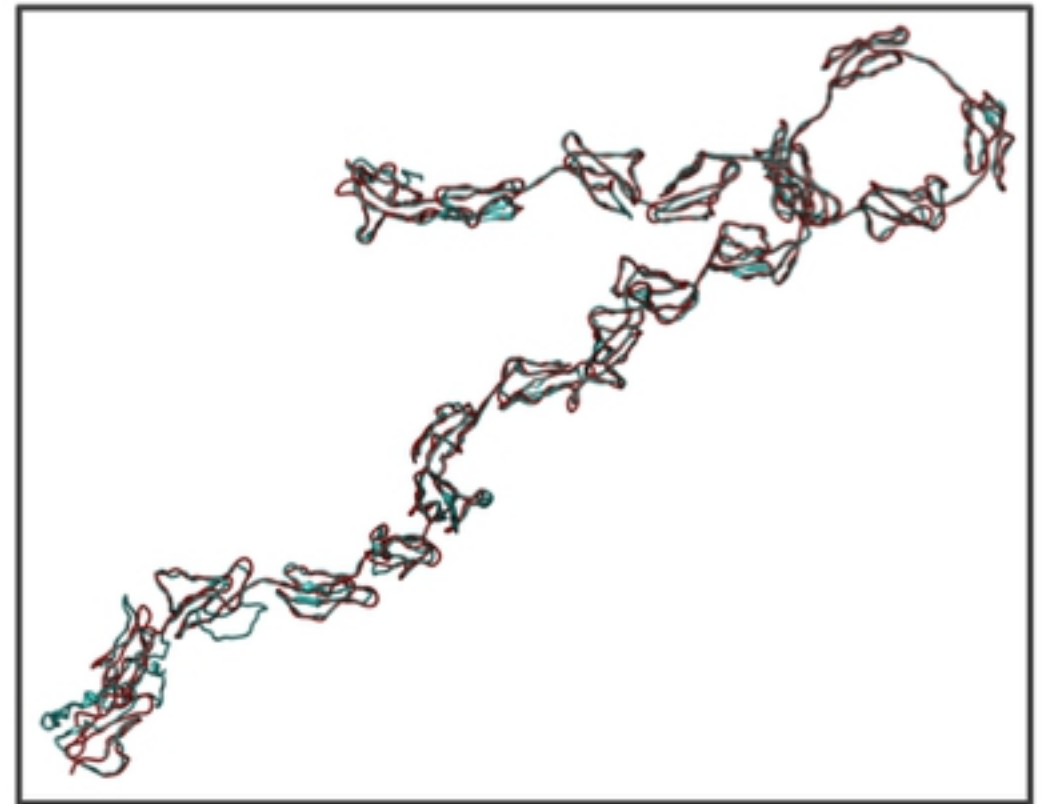**C**

Domains in human CFH

IPR000436

Sushi/SCR/CCP domain

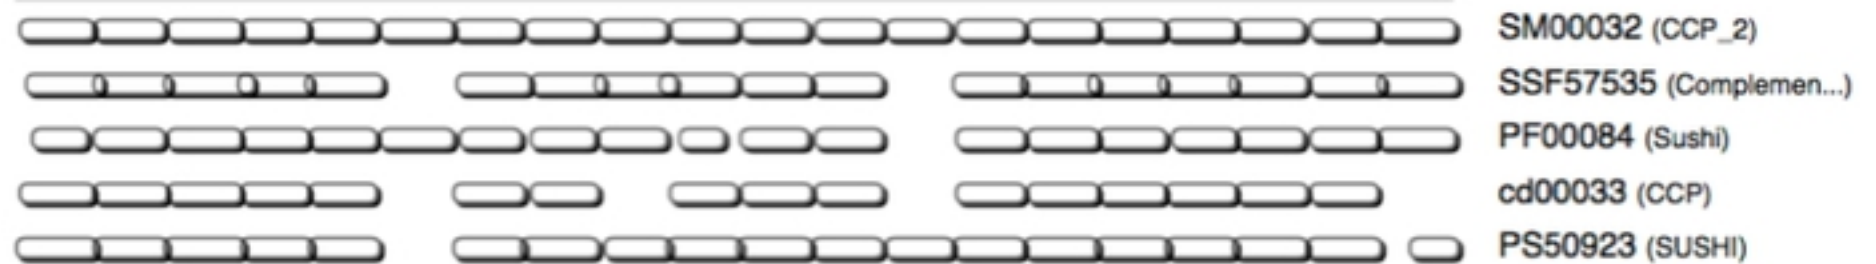

**A**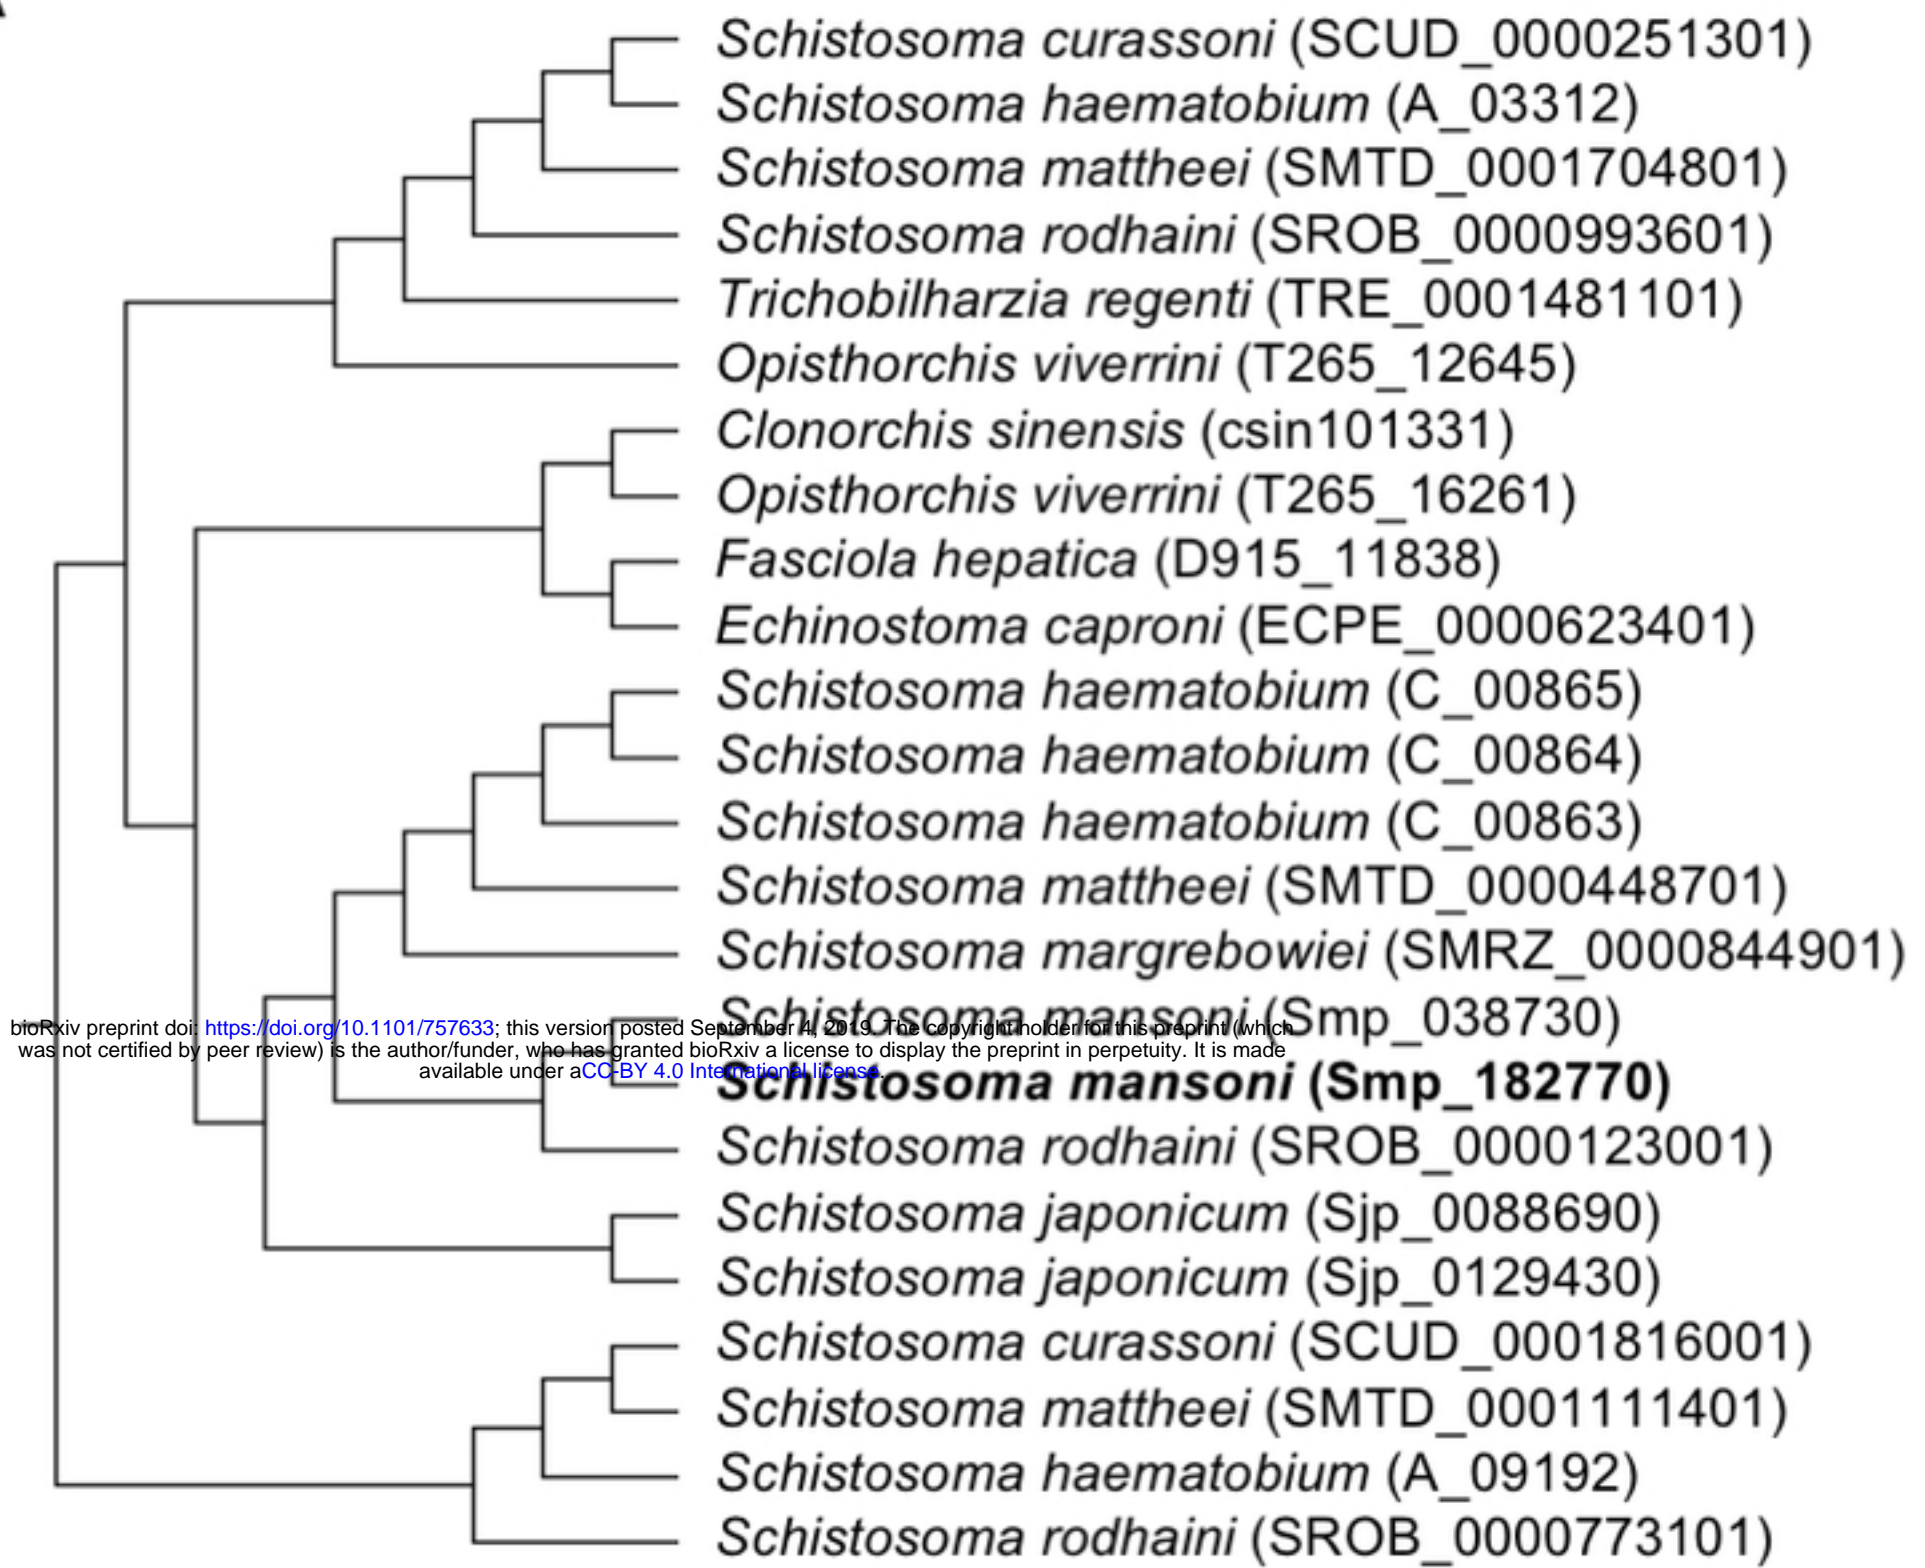

bioRxiv preprint doi: <https://doi.org/10.1101/757633>; this version posted September 4, 2019. The copyright holder for this preprint (which was not certified by peer review) is the author/funder, who has granted bioRxiv a license to display the preprint in perpetuity. It is made available under aCC-BY 4.0 International license.

**B**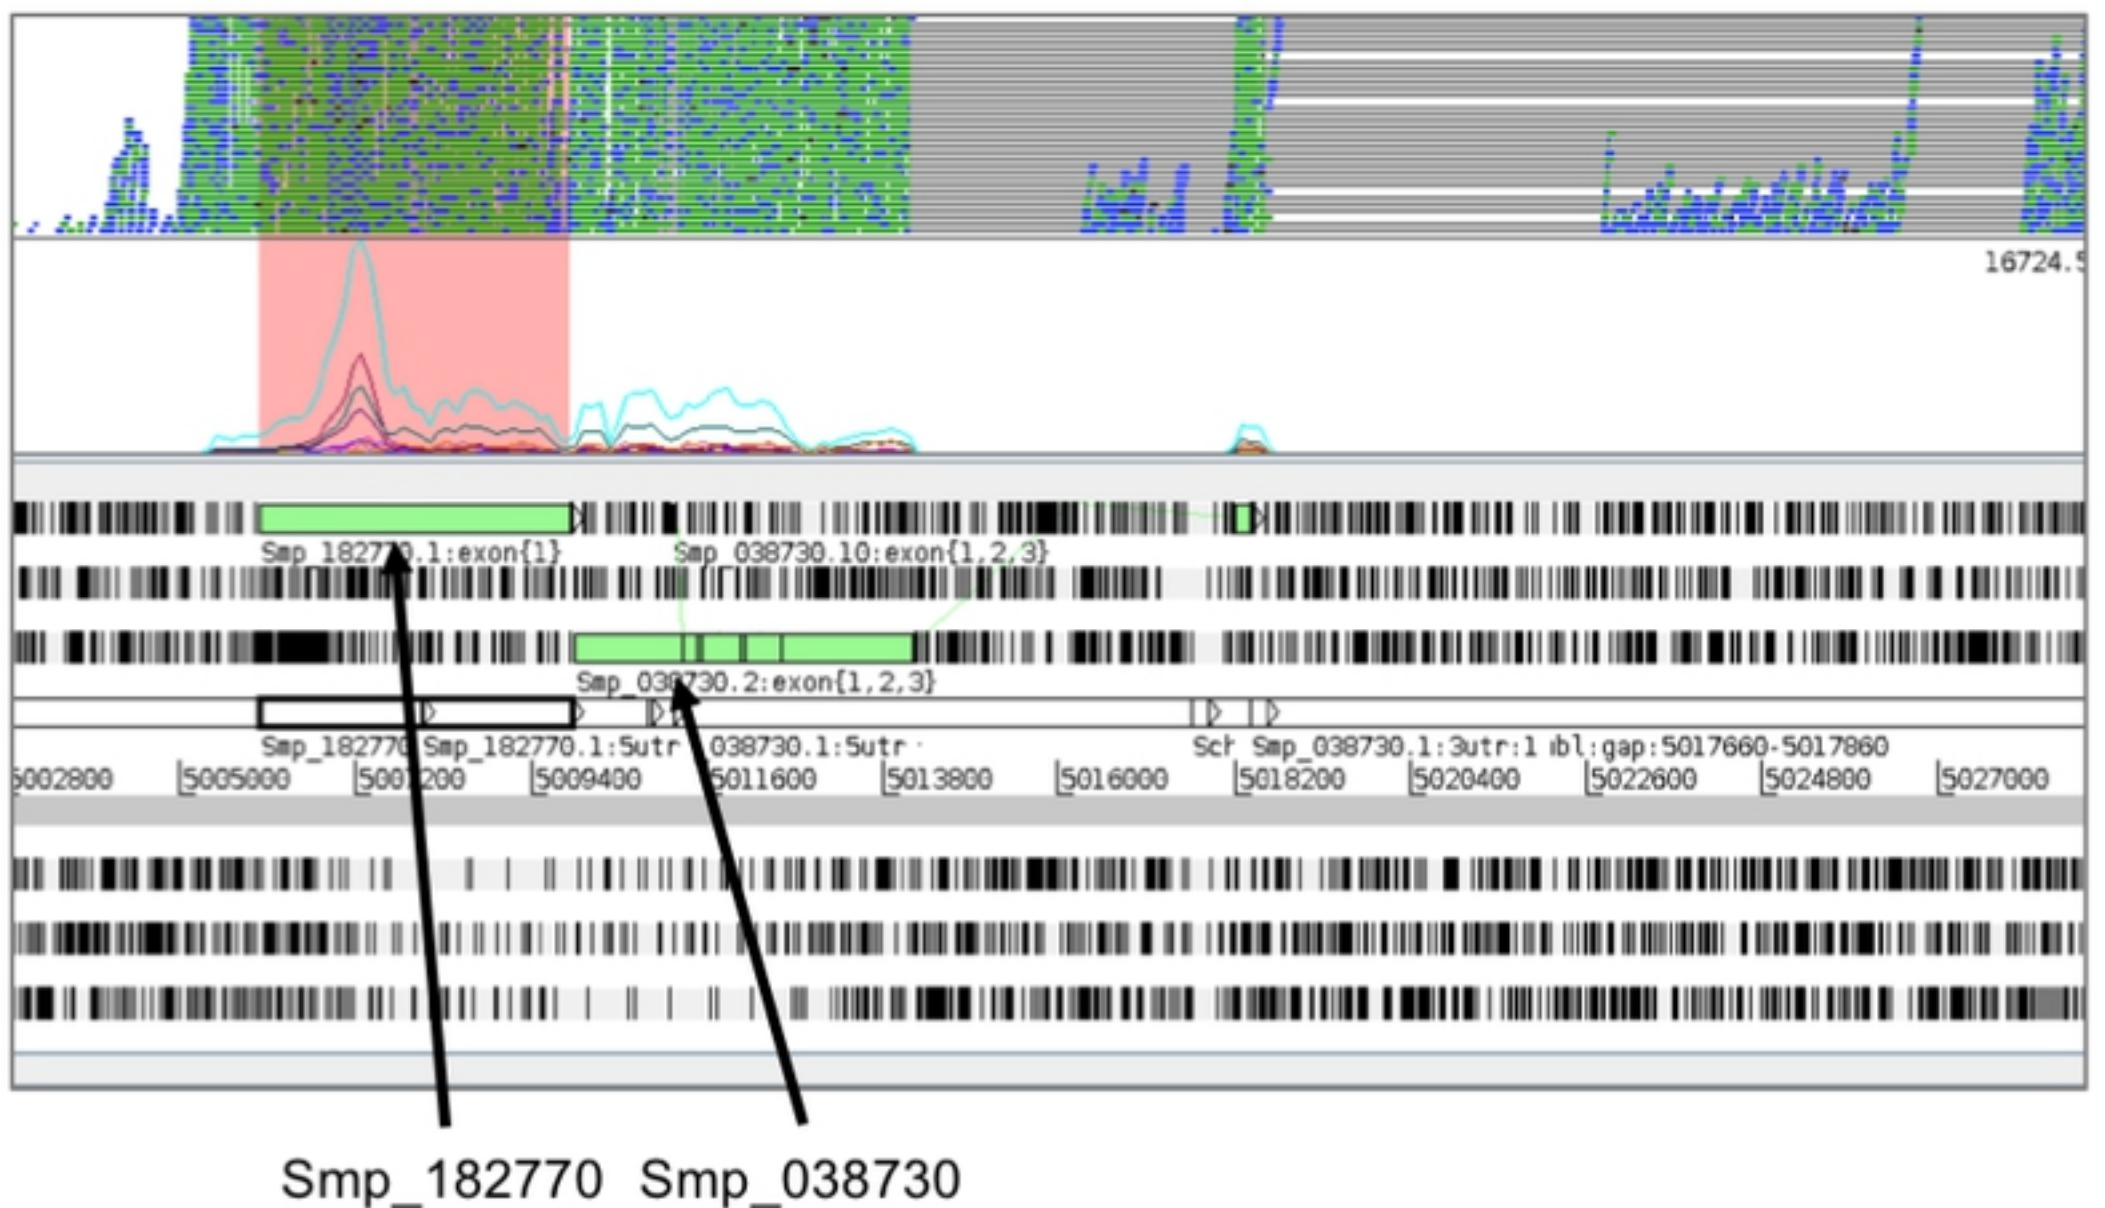

Figure
